# Supplementary material for: Isolation, characterization and toxicological potential of Alternaria-mycotoxins (TeA, AOH and AME) in different Alternaria species from various regions of India
Source: PubMed Central journal article supplement (PMC5562829; doi:10.1038/s41598-017-09138-9), 2017-08-18
Supplement: 41598_2017_9138_MOESM1_ESM.pdf [file 41598_2017_9138_MOESM1_ESM.pdf]

**Isolation, characterization and toxicological potential of Alternaria-mycotoxins (TeA, AOH and AOH) in different Alternaria species from various regions of India**

Mukesh Meena\*, Prashant Swapnil and R. S. Upadhyay

Department of Botany, Institute of Science, Banaras Hindu University, Varanasi 221005,  
India

**\*Corresponding Author:**

Mukesh Meena,  
Department of Botany,  
Institute of Science,  
Banaras Hindu University,  
Varanasi 221 005, India  
Email: [mukeshmeenabhu@gmail.com](mailto:mukeshmeenabhu@gmail.com)

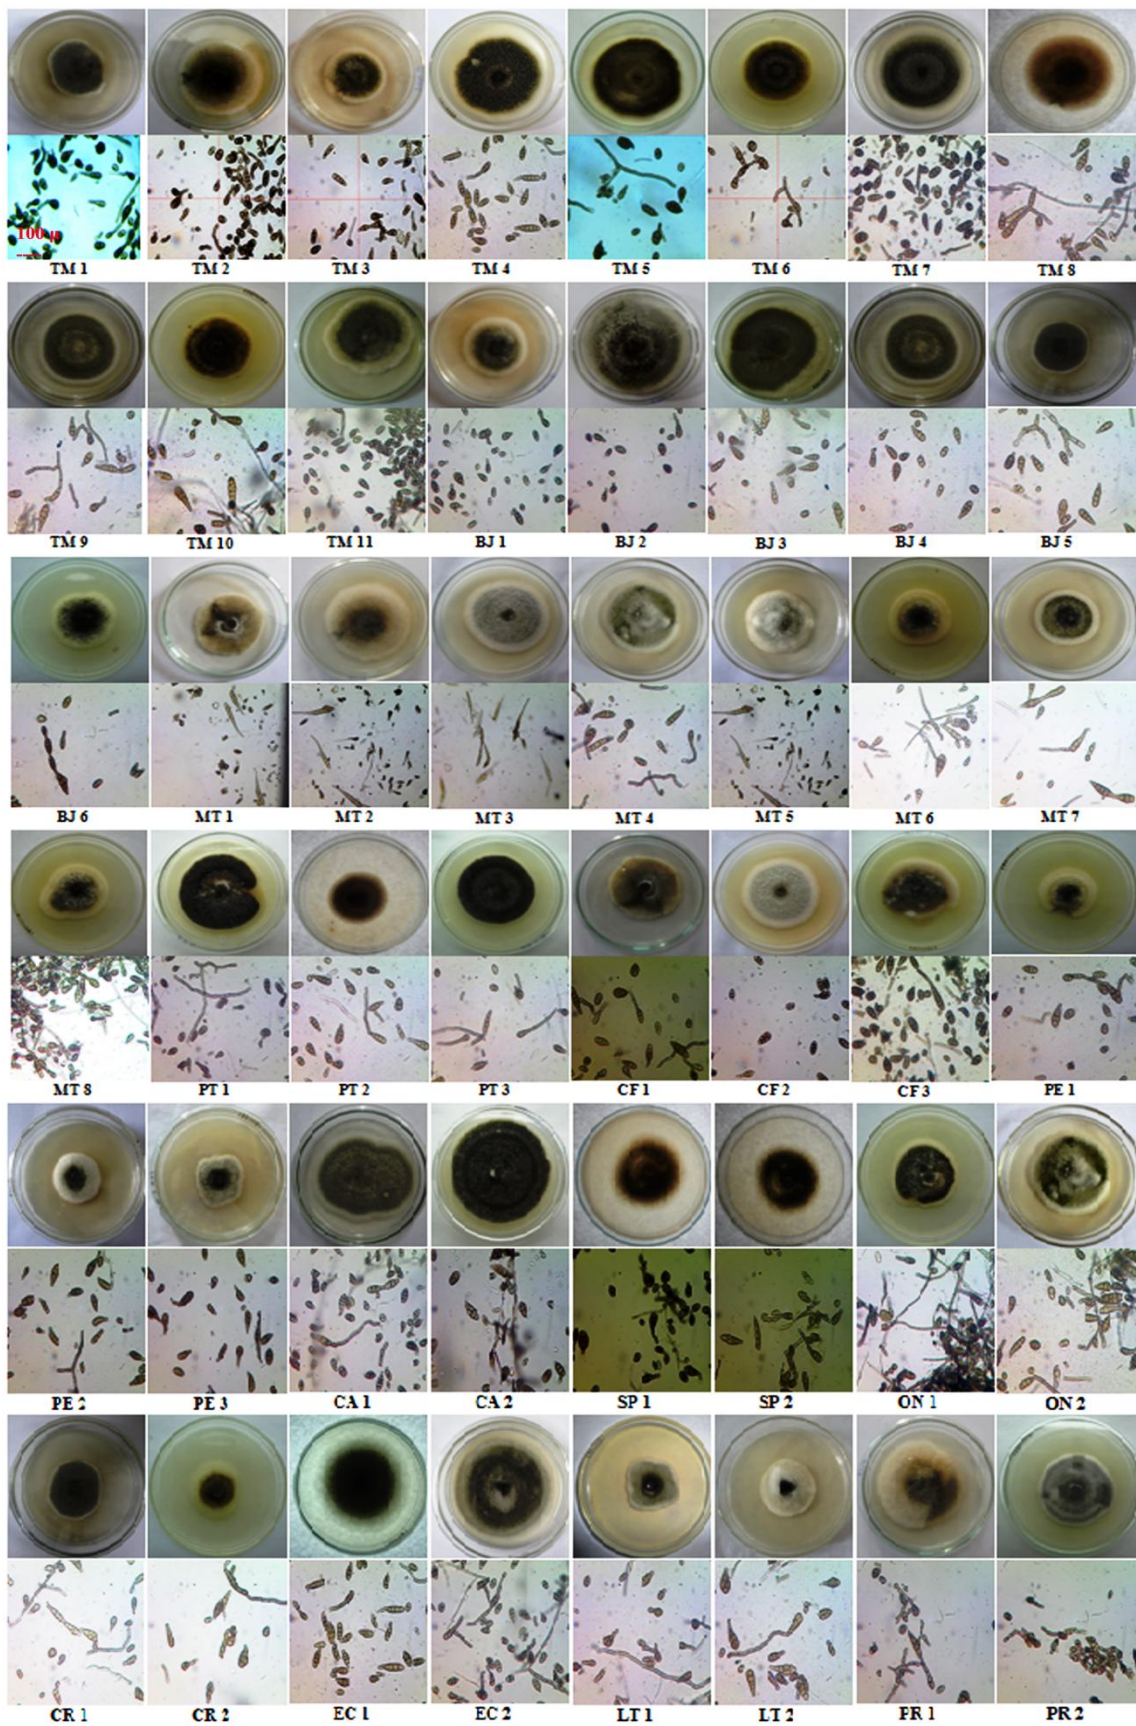

**Supplementary Figure S1.** Different isolates of *Alternaria* pathogen grown on PDA plate and its conidial morphology isolated from vegetables, crops, and weeds from different regions of India; Scale bar represents 100  $\mu$ .

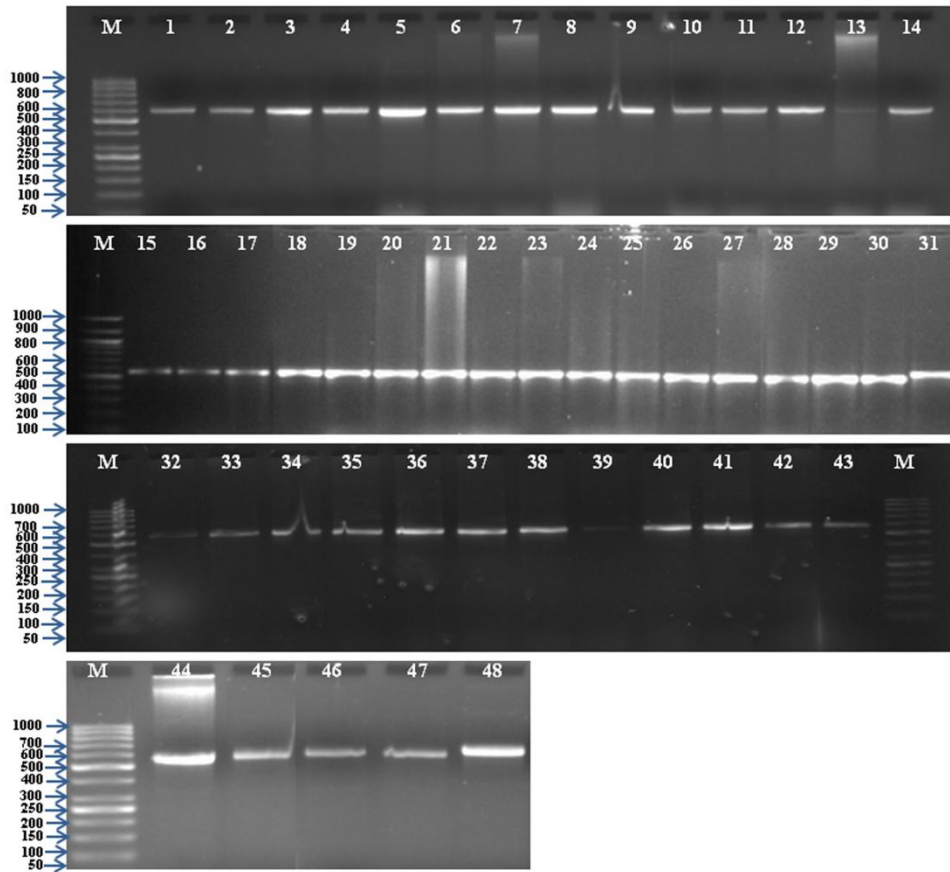

**Supplementary Figure S2.** Gel electrophoresis of PCR products with primers forward and reverse (ITS1/ITS4) of DNA from fungal isolates. Picture shows the amplified product of all 48 isolates of *Alternaria* species. The amplified products were found between 500-600 bp.

**Supplementary Figure S3.** Multiple sequence alignment of all the *Alternaria* spp. isolates showing conservation of residues as revealed through CLC Sequence Viewer 6.8.2.

(Supplementary Figure S3 given in separate PDF Image)

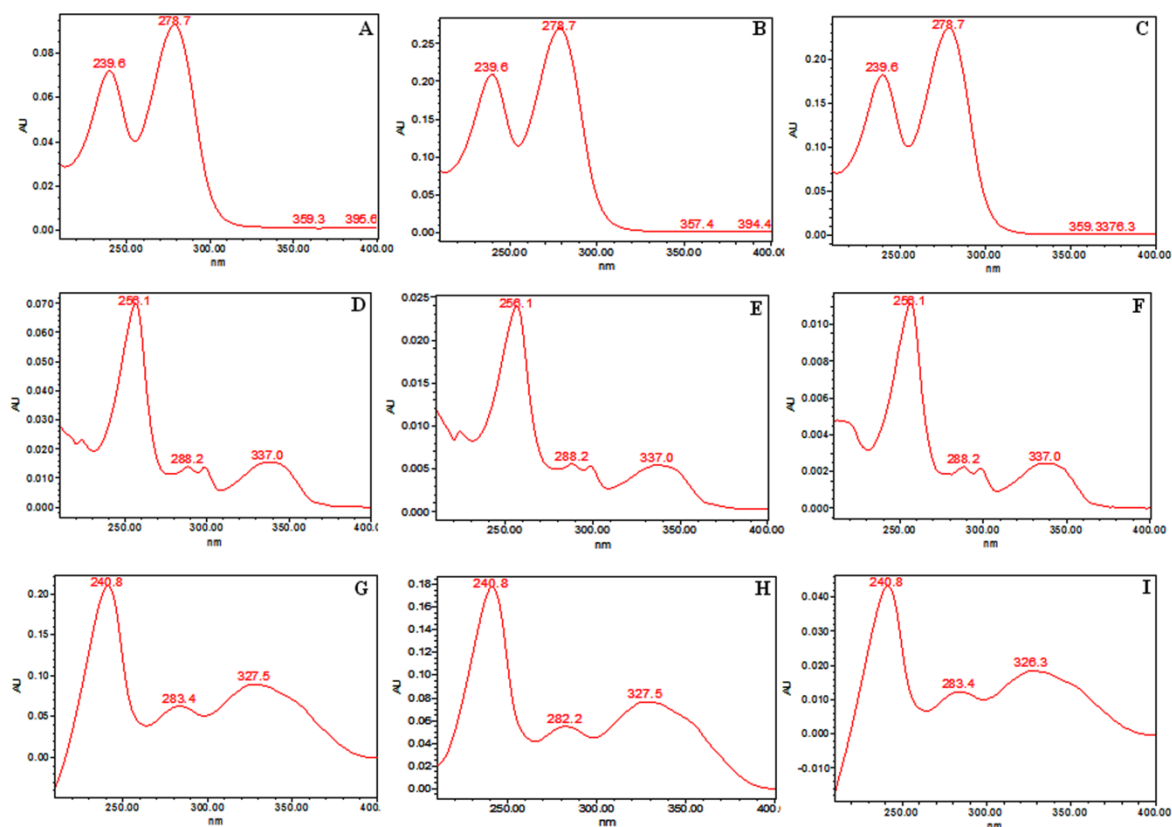

**Supplementary Figure S4.** Comparison of UV spectra of standard metabolites and isolated fungal metabolites from HPLC connected with diode array detector. **(A)** absorption peaks of standard TeA at 239.6 nm and 278.7 nm **(D)** absorption peaks of standard AOH at 256.1 nm, 288.2 nm and 337.0 nm **(G)** absorption peaks of standard AME at 240.8 nm, 283.4 nm and 327.5 nm **(B)** absorbance peaks of TeA (maximum conc.) as recorded from isolate TM 4 **(C)** absorbance peaks of TeA (minimum conc.) as recorded from isolate PE 1 **(E)** absorbance peaks of AOH (maximum conc.) from isolate TM 4 **(F)** absorbance peaks of AOH (minimum conc.) from isolate ON 1 **(H)** absorbance peaks of AME (maximum conc.) from isolate TM 4 **(I)** absorbance peaks of AME (minimum conc.) from BJ 6

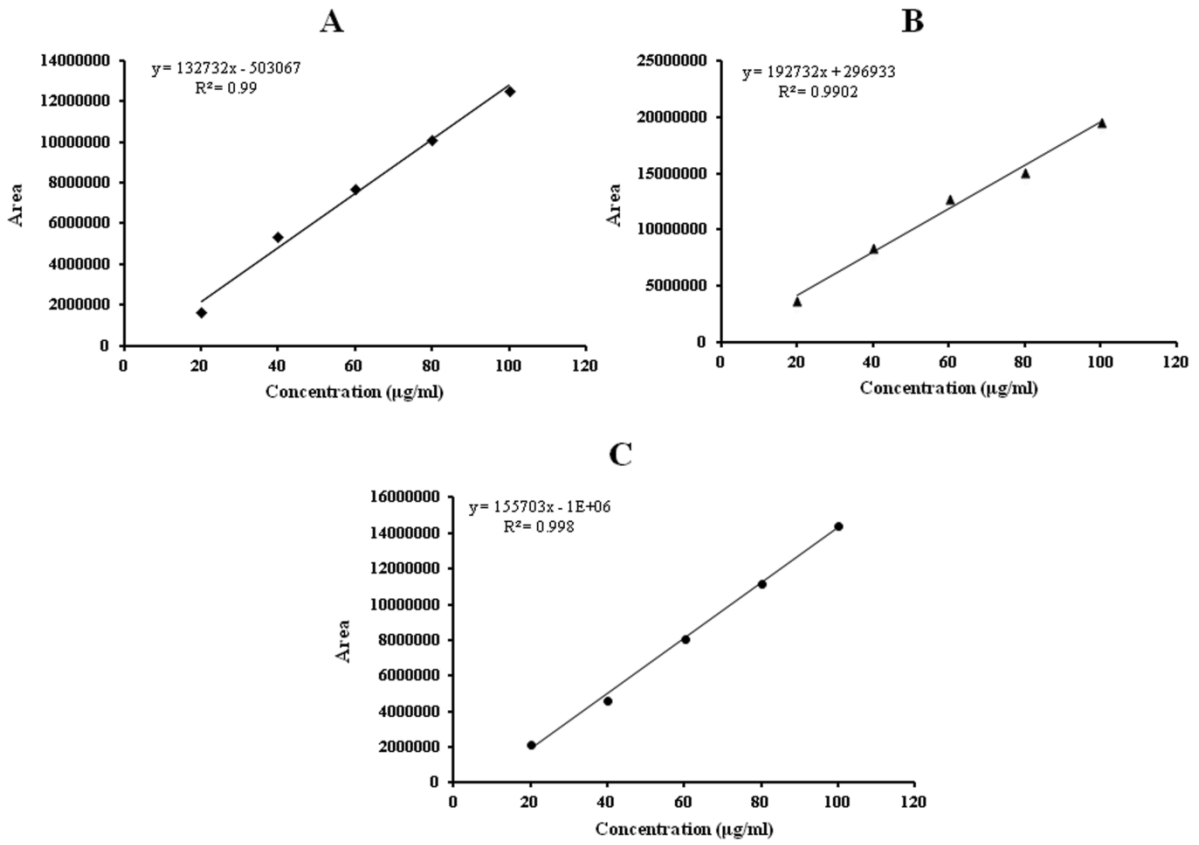

**Supplementary Figure S5.** Calibration curve of (A) tenuazonic acid, (B) alternariol, and (C) alternariol monomethyl ether standards.

**Supplementary Table S1.** LOD, LOQ, coefficient  $r^2$  and calibration curve equation of each toxin (TeA, AOH, and AME) of *Alternaria*.

| Toxins | LOD ( $\mu\text{g/ml}$ ) | LOQ ( $\mu\text{g/ml}$ ) | coefficient $r^2$ | equation           |
|--------|--------------------------|--------------------------|-------------------|--------------------|
| TeA    | 28.42                    | 86.13                    | 0.99              | $Y=132732x-503067$ |
| AOH    | 28.03                    | 84.94                    | 0.9902            | $Y=192732x+296933$ |
| AME    | 12.66                    | 38.36                    | 0.998             | $Y=155703x-1E+06$  |

**Supplementary Table S2.** Ion source setting on Accucore RP-MS 100 X 3, 2.6  $\mu\text{m}$ , ACQ-TQD-QBB1152 instrument.

| Settings                                       | ES+     |      | ES-     |      |
|------------------------------------------------|---------|------|---------|------|
| Source temperature ( $^{\circ}\text{C}$ )      | 120     | 118  | 120     | 118  |
| Desolvation temperature ( $^{\circ}\text{C}$ ) | 350     | 346  | 350     | 346  |
| Cone gas flow (L/Hr)                           | 30      | 30   | 30      | 30   |
| Desolvation gas flow (L/Hr)                    | 650     | 650  | 650     | 650  |
| Capillary voltage (KV)                         | 3.50    | 3.49 | 3.50    | 3.49 |
| Collision gas flow (mL/Min)                    | 0.18    | 0.14 | 0.10    | 0.14 |
| Ion energy 1                                   | 1.00    |      | 1.00    |      |
| Ion energy 2                                   | 3.00    |      | 1.00    |      |
| MS mode entrance                               | 50.00   |      | 50.00   |      |
| MS mode collision energy                       | 5.00    |      | 3.00    |      |
| MS mode exit                                   | 50.00   |      | 50.00   |      |
| MS/MS mode entrance                            | 2.00    |      | 2.00    |      |
| MS/MS mode collision energy                    | 15.00   |      | 25.00   |      |
| MS/MS mode exit                                | 2.00    |      | 2.00    |      |
| HM RF Lens (V)                                 | (+) 0.0 |      | (-) 0.0 |      |
| LM 1 resolution                                | 12.00   |      | 12.00   |      |
| HM 1 resolution                                | 12.00   |      | 12.00   |      |
| LM 2 resolution                                | 15.00   |      | 15.00   |      |
| HM 2 resolution                                | 15.00   |      | 15.00   |      |
| Multiplier                                     | -504.50 |      | -504.50 |      |

Note: Ion mode: ESI; Ion polarity: Positive and negative  
(MS method: C:\MassLynx\INTERNAL2011.pro\ACQUDB\SAIF9086.EXP)
