# Supplementary material for: Isolation, characterization and toxicological potential of Alternaria-mycotoxins (TeA, AOH and AME) in different Alternaria species from various regions of India
Source: PubMed Central journal article supplement (PMC5562829; doi:10.1038/s41598-017-09138-9), 2017-08-18
Supplement: 41598_2017_9138_MOESM2_ESM.pdf [file 41598_2017_9138_MOESM2_ESM.pdf]

|                                                      | 20    | 40    |       |
|------------------------------------------------------|-------|-------|-------|
| KX118413.1_Alternaria_alternata_strain_BHU-LMMT02    | ..... | ..... | ..... |
| KX118415.1_Alternaria_alternata_strain_BHU-LMMT04    | ..... | ..... | ..... |
| KX118418.1_Alternaria_alternata_strain_BHU-LMMT07    | ..... | ..... | ..... |
| KX118419.1_Alternaria_alternata_strain_BHU-LMMT08    | ..... | ..... | ..... |
| KX118421.1_Alternaria_brassicicola_strain_BHU-LMMT10 | ..... | ..... | ..... |
| KX118425.1_Alternaria_brassicicola_strain_BHU-LMMT14 | ..... | ..... | ..... |
| KX118426.1_Alternaria_brassicicola_strain_BHU-LMMT15 | ..... | ..... | ..... |
| KX118427.1_Alternaria_solani_strain_BHU-LMMT16       | ..... | ..... | ..... |
| KX118424.1_Alternaria_brassicicola_strain_BHU-LMMT13 | ..... | ..... | ..... |
| KX118414.1_Alternaria_alternata_strain_BHU-LMMT03    | ..... | ..... | ..... |
| KX118423.1_Alternaria_brassicicola_strain_BHU-LMMT12 | ..... | ..... | ..... |
| KX118412.1_Alternaria_alternata_strain_BHU-LMMT01    | ..... | ..... | ..... |
| KX118417.1_Alternaria_alternata_strain_BHU-LMMT06    | ..... | ..... | ..... |
| KX118420.1_Alternaria_alternata_strain_BHU-LMMT09    | ..... | ..... | ..... |
| KX118422.1_Alternaria_brassicicola_strain_BHU-LMMT11 | ..... | ..... | ..... |
| KX179478.1_Alternaria_alternata_strain_BHU-LMMT35    | ..... | ..... | ..... |
| KX118416.1_Alternaria_alternata_strain_BHU-LMMT05    | ..... | ..... | ..... |
| KX179483.1_Alternaria_alternata_strain_BHU-LMMT40    | ..... | ..... | ..... |
| KX179484.1_Alternaria_alternata_strain_BHU-LMMT41    | ..... | ..... | ..... |
| KX179485.1_Alternaria_alternata_strain_BHU-LMMT42    | ..... | ..... | ..... |
| KX179482.1_Alternaria_solani_strain_BHU-LMMT39       | ..... | ..... | ..... |
| KX139158.1_Alternaria_tenuissima_strain_BHU-LMMT25   | ..... | ..... | ..... |
| JQ070079.1                                           | ..... | ..... | ..... |
| KX179480.1_Alternaria_alternata_strain_BHU-LMMT37    | ..... | ..... | ..... |
| KX179479.1_Alternaria_alternata_strain_BHU-LMMT36    | ..... | ..... | ..... |
| KX139153.1_Alternaria_brassicicola_strain_BHU-LMMT20 | ..... | ..... | ..... |
| KX179489.1_Alternaria_alternata_strain_BHU-LMMT46    | ..... | ..... | ..... |
| KX139163.1_Alternaria_eichhorniae_strain_BHU-LMMT30  | ..... | ..... | ..... |
| KX179488.1_Alternaria_alternata_strain_BHU-LMMT45    | ..... | ..... | ..... |
| KX179481.1_Alternaria_solani_strain_BHU-LMMT38       | ..... | ..... | ..... |
| KX179487.1_Alternaria_sp._2_MM-2016                  | ..... | ..... | ..... |
| KX139164.1_Alternaria_eichhorniae_strain_BHU-LMMT31  | ..... | ..... | ..... |
| KX179490.1_Alternaria_sp._3_MM-2016                  | ..... | ..... | ..... |
| KX179477.1_Alternaria_alternata_strain_BHU-LMMT34    | ..... | ..... | ..... |
| KX179486.1_Alternaria_sp._1_MM-2016                  | ..... | ..... | ..... |
| KX179491.1_Alternaria_sp._4_MM-2016                  | ..... | ..... | ..... |
| KX139154.1_Alternaria_brassicicola_strain_BHU-LMMT21 | ..... | ..... | ..... |
| KX139152.1_Alternaria_brassicicola_strain_BHU-LMMT19 | ..... | ..... | ..... |
| KX139165.1_Alternaria_macrospora_strain_BHU-LMMT32   | ..... | ..... | ..... |
| KX139166.1_Alternaria_macrospora_strain_BHU-LMMT33   | ..... | ..... | ..... |
| KX139150.1_Alternaria_solani_strain_BHU-LMMT17       | ..... | ..... | ..... |
| KX139151.1_Alternaria_solani_strain_BHU-LMMT18       | ..... | ..... | ..... |
| KX139162.1_Alternaria_porri_strain_BHU-LMMT29        | ..... | ..... | ..... |
| KX139159.1_Alternaria_brassicicola_strain_BHU-LMMT26 | ..... | ..... | ..... |
| KX139160.1_Alternaria_brassicicola_strain_BHU-LMMT27 | ..... | ..... | ..... |
| KX139157.1_Alternaria_tenuissima_strain_BHU-LMMT24   | ..... | ..... | ..... |
| KX139161.1_Alternaria_porri_strain_BHU-LMMT28        | ..... | ..... | ..... |
| KX139155.1_Alternaria_brassicicola_strain_BHU-LMMT22 | ..... | ..... | ..... |
| KX139156.1_Alternaria_brassicicola_strain_BHU-LMMT23 | ..... | ..... | ..... |
| Consensus                                            | ..... | ..... | ..... |
| Conservation                                         | ..... | ..... | ..... |

|                                                      | 60                                                                 | 80    | 100   |                                                         |               |
|------------------------------------------------------|--------------------------------------------------------------------|-------|-------|---------------------------------------------------------|---------------|
| KX118413.1_Alternaria_alternata_strain_BHU-LMMT02    | -----                                                              | ----- | ----- | ---GGCTT GGA---CCT 10                                   |               |
| KX118415.1_Alternaria_alternata_strain_BHU-LMMT04    | -----                                                              | ----- | ----- | ---GGGGCT GGA---CCT 13                                  |               |
| KX118418.1_Alternaria_alternata_strain_BHU-LMMT07    | -----                                                              | ----- | ----- | ---GGGCT GGA---CCT 11                                   |               |
| KX118419.1_Alternaria_alternata_strain_BHU-LMMT08    | -----                                                              | ----- | ----- | ---GGGCT GGA---CCT 11                                   |               |
| KX118421.1_Alternaria_brassicicola_strain_BHU-LMMT10 | -----                                                              | ----- | ----- | ---GGCT GGA---CCT 10                                    |               |
| KX118425.1_Alternaria_brassicicola_strain_BHU-LMMT14 | -----                                                              | ----- | ----- | ---GGGCT GGA---CCT 11                                   |               |
| KX118426.1_Alternaria_brassicicola_strain_BHU-LMMT15 | -----                                                              | ----- | ----- | ---GGCT GGA---CCT 10                                    |               |
| KX118427.1_Alternaria_solani_strain_BHU-LMMT16       | -----                                                              | ----- | ----- | ---GGGCT GGA---CCT 11                                   |               |
| KX118424.1_Alternaria_brassicicola_strain_BHU-LMMT13 | -----                                                              | ----- | ----- | ---GGGCT GGA---CCT 11                                   |               |
| KX118414.1_Alternaria_alternata_strain_BHU-LMMT03    | -----                                                              | ----- | ----- | ---GGGGCT GGA---CCT 12                                  |               |
| KX118423.1_Alternaria_brassicicola_strain_BHU-LMMT12 | -----                                                              | ----- | ----- | ---GGGGCT GGA---CCT 12                                  |               |
| KX118412.1_Alternaria_alternata_strain_BHU-LMMT01    | -----                                                              | ----- | ----- | ---GGCT GGA---CCT 10                                    |               |
| KX118417.1_Alternaria_alternata_strain_BHU-LMMT06    | -----                                                              | ----- | ----- | ---GGGGCT GGA---CCT 12                                  |               |
| KX118420.1_Alternaria_alternata_strain_BHU-LMMT09    | -----                                                              | ----- | ----- | ---GGGGCT GGA---CCT 12                                  |               |
| KX118422.1_Alternaria_brassicicola_strain_BHU-LMMT11 | -----                                                              | ----- | ----- | ---GGGGCT GGA---CCT 12                                  |               |
| KX179478.1_Alternaria_alternata_strain_BHU-LMMT35    | -----                                                              | ----- | ----- | ---GGGGGCT GGA---CCT 13                                 |               |
| KX118416.1_Alternaria_alternata_strain_BHU-LMMT05    | -----                                                              | ----- | ----- | -----                                                   | GGA---CCT 6   |
| KX179483.1_Alternaria_alternata_strain_BHU-LMMT40    | -----                                                              | ----- | ----- | ---C--TCAT GAG--GGGGCT GGA---CCT 20                     |               |
| KX179484.1_Alternaria_alternata_strain_BHU-LMMT41    | -----                                                              | ----- | ----- | ---GGA--CCCT GAG--GGGGCT GGA---CCT 22                   |               |
| KX179485.1_Alternaria_alternata_strain_BHU-LMMT42    | -----                                                              | ----- | ----- | ---GAAA--ATAT GAGGGGGGCT GGA---CCT 25                   |               |
| KX179482.1_Alternaria_solani_strain_BHU-LMMT39       | -----                                                              | ----- | ----- | ---T--TAAT GAG--GGGGCT GGA---CCT 20                     |               |
| KX139158.1_Alternaria_tenuissima_strain_BHU-LMMT25   | -----                                                              | ----- | ----- | ---AAA TCAA--ATAT GAGGGGGGCT GGA---CCT 27               |               |
| JQ070079.1                                           | <b>NCE</b> GGGGAGG GATCATTACA CAAA--TATG AAGGGGGGCT GGA---ACCT 50  |       |       |                                                         |               |
| KX179480.1_Alternaria_alternata_strain_BHU-LMMT37    | ---GGGGAGG GATCATTACA CAAA--TATG AAGGGGGGCT GGA---ACCT 42          |       |       |                                                         |               |
| KX179479.1_Alternaria_alternata_strain_BHU-LMMT36    | ---GGGGAGG GATCATTACA CAAA--TATG AAGGGGGGCT GGA---ACCT 42          |       |       |                                                         |               |
| KX139153.1_Alternaria_brassicicola_strain_BHU-LMMT20 | <b>CCTGCGGAGG</b> GATCATTACA CAAA--TATG AAGGGGGGCT GGA---ACCT 60   |       |       |                                                         |               |
| KX179489.1_Alternaria_alternata_strain_BHU-LMMT46    | <b>CCTGCGGAGG</b> GATCATTACA CAAA--TATG AAGGGGGGCT GGA---ACCT 59   |       |       |                                                         |               |
| KX139163.1_Alternaria_eichhorniae_strain_BHU-LMMT30  | -----                                                              | ----- | ----- | ---ATCATTACA CAAA--TATG AAGGGGGGCT GGA---ATCT 34        |               |
| KX179488.1_Alternaria_alternata_strain_BHU-LMMT45    | -----                                                              | ----- | ----- | ---CCTCATTACA CAAA--TATG AAGGGGGGCT GGA---ACCT 35       |               |
| KX179481.1_Alternaria_solani_strain_BHU-LMMT38       | -----                                                              | ----- | ----- | ---GG GTTTTGTGTC ATGG--TATG A--GGGGGGCT GGA---CCT 35    |               |
| KX179487.1_Alternaria_sp._2_MM-2016                  | <b>CCCAAGT</b> GCG ACTC--TTACA CAA--TATG A--GGGGGGCT GGA---ACCT 45 |       |       |                                                         |               |
| KX139164.1_Alternaria_eichhorniae_strain_BHU-LMMT31  | -----                                                              | ----- | ----- | ---AATCATTACA CAAA--TATG AAGGGGGGCT GGA---ACCT 35       |               |
| KX179490.1_Alternaria_sp._3_MM-2016                  | <b>CCTGCGGGGG</b> GATCATTACA CAAA--TATG AAGGGGGGCT GGA---ACCT 75   |       |       |                                                         |               |
| KX179477.1_Alternaria_alternata_strain_BHU-LMMT34    | <b>CATTGCC-TG</b> CAAAGCTTA CCAA--TATG A--GGGGGGCT GGA---CCT 47    |       |       |                                                         |               |
| KX179486.1_Alternaria_sp._1_MM-2016                  | <b>GTTTGCAATG</b> CGA-GTCTTA CCAA--TATG A--GGGGGGCT GGA---ACCT 44  |       |       |                                                         |               |
| KX179491.1_Alternaria_sp._4_MM-2016                  | <b>CCTGCGGAGG</b> GATCATTACA CAAA--TATG AAGGGGGGCT GGA---ACCT 82   |       |       |                                                         |               |
| KX139154.1_Alternaria_brassicicola_strain_BHU-LMMT21 | <b>CCTGCGGAGG</b> GATCATTACA C-AA--TATG AAGGCAGGCT GAA---ATCT 85   |       |       |                                                         |               |
| KX139152.1_Alternaria_brassicicola_strain_BHU-LMMT19 | -----                                                              | ----- | ----- | ---AA--ATCT 6                                           |               |
| KX139165.1_Alternaria_macrospora_strain_BHU-LMMT32   | -----                                                              | ----- | ----- | ---AGG GATCATTACA CAAA--TATG AAGGGGGGCT GGC---ACCT 38   |               |
| KX139166.1_Alternaria_macrospora_strain_BHU-LMMT33   | -----                                                              | ----- | ----- | ---ATCATTACA CAAA--TATG AAGGGGGGCT GGC---ACCT 34        |               |
| KX139150.1_Alternaria_solani_strain_BHU-LMMT17       | -----                                                              | ----- | ----- | -----                                                   | GGC---ACCT 13 |
| KX139151.1_Alternaria_solani_strain_BHU-LMMT18       | <b>CCTGCGGAGG</b> GATCATTACA CAAAAATATG AAGGGGGGCT GGC---ACCT 97   |       |       |                                                         |               |
| KX139162.1_Alternaria_porri_strain_BHU-LMMT29        | <b>CCTGCGGAGG</b> GATCATTACA CAAA--TATG AAGGGGGGCT GGC---ACCT 94   |       |       |                                                         |               |
| KX139159.1_Alternaria_brassicicola_strain_BHU-LMMT26 | -----                                                              | ----- | ----- | ---ATCATTACA CAA--TATG AAAGGGGGCT GGACTCACCT 36         |               |
| KX139160.1_Alternaria_brassicicola_strain_BHU-LMMT27 | <b>C</b> -----GG GATCATTACA CAA--TATG AAAGGGGGCT GGACTCACCT 42     |       |       |                                                         |               |
| KX139157.1_Alternaria_tenuissima_strain_BHU-LMMT24   | -----                                                              | ----- | ----- | ---TTGCGAG GATCTT-- --AAAGTATG A--GGGGGGCT GGA---CCT 36 |               |
| KX139161.1_Alternaria_porri_strain_BHU-LMMT28        | <b>CCTGCGGAAG</b> GATCATTACC TAGAGTTGTA ----- GGCT ----- TTGCCT 56 |       |       |                                                         |               |
| KX139155.1_Alternaria_brassicicola_strain_BHU-LMMT22 | -----                                                              | ----- | ----- | -----                                                   |               |
| KX139156.1_Alternaria_brassicicola_strain_BHU-LMMT23 | -----                                                              | ----- | ----- | -----                                                   |               |
| Consensus                                            | -----                                                              | ----- | ----- | ---A--TATG A--GGGGGGCT GGA---CCT                        |               |

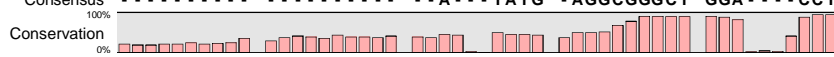

|                                                      | 120        | 140        |                                     |
|------------------------------------------------------|------------|------------|-------------------------------------|
| KX118413.1_Alternaria_alternata_strain_BHU-LMMT02    | CT-CGGGGTT | A-C        | G---CCTTG CTGAA-TTA-----TTCAC 41    |
| KX118415.1_Alternaria_alternata_strain_BHU-LMMT04    | CT-CGGGGTT | A-C        | G---CCTTG CTGAA-TTA-----TTCAC 44    |
| KX118418.1_Alternaria_alternata_strain_BHU-LMMT07    | CT-CGGGGTT | A-C        | G---CCTTG CTGAA-TTA-----TTCAC 42    |
| KX118419.1_Alternaria_alternata_strain_BHU-LMMT08    | CT-CGGGGTT | A-C        | G---CCTTG CTGAA-TTA-----TTCAC 42    |
| KX118421.1_Alternaria_brassicicola_strain_BHU-LMMT10 | CT-CGGGGTT | A-C        | G---CCTTG CTGAA-TTA-----TTCAC 41    |
| KX118425.1_Alternaria_brassicicola_strain_BHU-LMMT14 | CT-CGGGGTT | A-C        | G---CCTTG CTGAA-TTA-----TTCAC 42    |
| KX118426.1_Alternaria_brassicicola_strain_BHU-LMMT15 | CT-CGGGGTT | A-C        | G---CCTTG CTGAA-TTA-----TTCAC 41    |
| KX118427.1_Alternaria_solani_strain_BHU-LMMT16       | CT-CGGGGTT | A-C        | G---CCTTG CTGAA-TTA-----TTCAC 42    |
| KX118424.1_Alternaria_brassicicola_strain_BHU-LMMT13 | CT-CGGGGTT | A-C        | G---CCTTG CTGAA-TTA-----TTCAC 42    |
| KX118414.1_Alternaria_alternata_strain_BHU-LMMT03    | CT-CGGGGTT | A-C        | G---CCTTG CTGAA-TTA-----TTCAC 43    |
| KX118423.1_Alternaria_brassicicola_strain_BHU-LMMT12 | CT-CGGGGTT | A-C        | G---CCTTG CTGAA-TTA-----TTCAC 43    |
| KX118412.1_Alternaria_alternata_strain_BHU-LMMT01    | CT-CGGGGTT | A-C        | G---CCTTG CTGAA-TTA-----TTCAC 41    |
| KX118417.1_Alternaria_alternata_strain_BHU-LMMT06    | CT-CGGGGTT | A-C        | G---CCTTG CTGAA-TTA-----TTCAC 43    |
| KX118420.1_Alternaria_alternata_strain_BHU-LMMT09    | CT-CGGGGTT | A-C        | G---CCTTG CTGAA-TTA-----TTCAC 43    |
| KX118422.1_Alternaria_brassicicola_strain_BHU-LMMT11 | CT-CGGGGTT | A-C        | G---CCTTG CTGAA-TTA-----TTCAC 43    |
| KX179478.1_Alternaria_alternata_strain_BHU-LMMT35    | CT-CGGGGTT | A-C        | G---CCTTG CTGAA-TTA-----TTCAC 44    |
| KX118416.1_Alternaria_alternata_strain_BHU-LMMT05    | CT-CGGGGTT | A-C        | G---CCTTG CTGAA-TTA-----TTCAC 37    |
| KX179483.1_Alternaria_alternata_strain_BHU-LMMT40    | CT-CGGGGTT | A-C        | G---CCTTG CTGAA-TTA-----TTCAC 51    |
| KX179484.1_Alternaria_alternata_strain_BHU-LMMT41    | CT-CGGGGTT | A-C        | G---CCTTG CTGAA-TTA-----TTCAC 53    |
| KX179485.1_Alternaria_alternata_strain_BHU-LMMT42    | CT-CGGGGTT | A-C        | G---CCTTG CTGAA-TTA-----TTCAC 56    |
| KX179482.1_Alternaria_solani_strain_BHU-LMMT39       | CT-CGGGGTT | A-C        | G---CCTTG CTGAA-TTA-----TTCAC 51    |
| KX139158.1_Alternaria_tenuissima_strain_BHU-LMMT25   | CT-CGGGGTT | A-C        | G---CCTTG CTGAA-TTA-----TTCAC 58    |
| JQ070079.1                                           | CT-CGGGGTT | A-C        | G---CCTTG CTGAA-TTA-----TTCAC 81    |
| KX179480.1_Alternaria_alternata_strain_BHU-LMMT37    | CT-CGGGGTT | A-C        | G---CCTTG CTGAA-TTAA AAATTTTCAC 79  |
| KX179479.1_Alternaria_alternata_strain_BHU-LMMT36    | CT-CGGGGTT | A-C        | G---CCTTG CTGAA-TTA-----TTCAC 73    |
| KX139153.1_Alternaria_brassicicola_strain_BHU-LMMT20 | CT-CGGGGTT | AAC        | G---CCTTG CTGAA-TTA-----TTCAC 92    |
| KX179489.1_Alternaria_alternata_strain_BHU-LMMT46    | CT-CGGGGTT | A-C        | GG-GCCTTG CTGAA-TTA-----TTCAC 92    |
| KX139163.1_Alternaria_eichhorniae_strain_BHU-LMMT30  | CT-CGGGGTT | -          | -ACAGCCTTG CTGAA-TTA-----TTCAC 65   |
| KX179488.1_Alternaria_alternata_strain_BHU-LMMT45    | CT-CGGGGTT | A-C        | G---CCTTG CTGAA-TTA-----TTCAC 66    |
| KX179481.1_Alternaria_solani_strain_BHU-LMMT38       | CT-CGGGGTT | A-C        | G---CCTTG CTGAA-TTA-----TTCAC 66    |
| KX179487.1_Alternaria_sp._2_MM-2016                  | CT-CGGGGTT | A-C        | G---CCTTG CTGAA-TTA-----TTCAC 76    |
| KX139164.1_Alternaria_eichhorniae_strain_BHU-LMMT31  | CT-CGGGGTT | A-C        | G---CCTTG CTGAA-TTA-----TTCAC 66    |
| KX179490.1_Alternaria_sp._3_MM-2016                  | CT-CGGGGTT | A-C        | G---CCTTG CTGAA-TTA-----TTCAC 106   |
| KX179477.1_Alternaria_alternata_strain_BHU-LMMT34    | CT-CGGGGTT | A-C        | G---CCTTG CTGAA-TTA-----TTCAC 78    |
| KX179486.1_Alternaria_sp._1_MM-2016                  | CT-CGGGGTT | A-C        | G---CCTTG CTGAA-TTA-----TTCAC 75    |
| KX179491.1_Alternaria_sp._4_MM-2016                  | CT-CGGGGTT | A-C        | G---CCTTG CTGAA-TTA-----TTCAC 113   |
| KX139154.1_Alternaria_brassicicola_strain_BHU-LMMT21 | CT-CGAGACG | A-C        | G---CCTTG CTGAA-TTA-----TTCAC 116   |
| KX139152.1_Alternaria_brassicicola_strain_BHU-LMMT19 | CT-CGAGACG | A-C        | G---CCTTG CTGAA-TTA-----TTCAC 37    |
| KX139165.1_Alternaria_macrospora_strain_BHU-LMMT32   | CT-CGGGGTG | GCC        | G---CCTTG CTGAA-TTA-----TTC-AC 70   |
| KX139166.1_Alternaria_macrospora_strain_BHU-LMMT33   | CT-CGGGGTG | GCC        | G---CCTTG CTGAA-TTA-----TTCAC 67    |
| KX139150.1_Alternaria_solani_strain_BHU-LMMT17       | CC-CGGGGTG | GCC        | G---CCTTG CTGAA-TTA-----TTCAC 46    |
| KX139151.1_Alternaria_solani_strain_BHU-LMMT18       | CC-CGGGGTG | GCC        | G---CCTTG CTGAA-TTA-----TTCAC 130   |
| KX139162.1_Alternaria_porri_strain_BHU-LMMT29        | CC-CGGGGTG | GCC        | G---CCTTG CTGAA-TTA-----TTCAC 127   |
| KX139159.1_Alternaria_brassicicola_strain_BHU-LMMT26 | CAGCAGCATC | TGCTGTTGGG | GCCAGCCTTG CTGAA-TTA-----TTCAC 79   |
| KX139160.1_Alternaria_brassicicola_strain_BHU-LMMT27 | CAGCAGCATC | TGCTGTTGGG | GCCAGCCTTG CTGAA-TTA-----TTCAC 85   |
| KX139157.1_Alternaria_tenuissima_strain_BHU-LMMT24   | CT-CAGGGTT | -----AA    | G---CCTTG CTGAA-TTA-----TTCAC 66    |
| KX139161.1_Alternaria_porri_strain_BHU-LMMT28        | -----GCT   | ATCT-----  | -----CTTA-----C 69                  |
| KX139155.1_Alternaria_brassicicola_strain_BHU-LMMT23 | -----      | -----A     | CAGGTCTGTG ATGCCCTTAG ATGTTCTGGG 31 |
| KX139156.1_Alternaria_brassicicola_strain_BHU-LMMT22 | -----      | -----      | -----                               |
| Consensus                                            | CT-CGGGGTT | A-C        | G---CCTTG CTGAA-TTA-----TTCAC       |

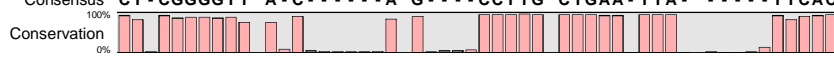

|                                                      | 160        | 180        | 200        |           |            |       |       |       |       |        |        |      |        |      |     |
|------------------------------------------------------|------------|------------|------------|-----------|------------|-------|-------|-------|-------|--------|--------|------|--------|------|-----|
| KX118413.1_Alternaria_alternata_strain_BHU-LMMT02    | CCTTG      | -TCT       | TTTG       | -CGTA     | C          | ----- | TTC   | TTGTT | -T    | C      | CCTGGT | GGGT | 78     |      |     |
| KX118415.1_Alternaria_alternata_strain_BHU-LMMT04    | CCTTG      | -TCT       | TTTG       | -CGTA     | C          | ----- | TTC   | TTGTT | -T    | C      | CCTGGT | GGGT | 81     |      |     |
| KX118418.1_Alternaria_alternata_strain_BHU-LMMT07    | CCTTG      | -TCT       | TTTG       | -CGTA     | C          | ----- | TTC   | TTGTT | -T    | C      | CCTGGT | GGGT | 79     |      |     |
| KX118419.1_Alternaria_alternata_strain_BHU-LMMT08    | CCTTG      | -TCT       | TTTG       | -CGTA     | C          | ----- | TTC   | TTGTT | -T    | C      | CCTGGT | GGGT | 79     |      |     |
| KX118421.1_Alternaria_brassicicola_strain_BHU-LMMT10 | CCTTG      | -TCT       | TTTG       | -CGTA     | C          | ----- | TTC   | TTGTT | -T    | C      | CCTGGT | GGGT | 78     |      |     |
| KX118425.1_Alternaria_brassicicola_strain_BHU-LMMT14 | CCTTG      | -TCT       | TTTG       | -CGTA     | C          | ----- | TTC   | TTGTT | -T    | C      | CCTGGT | GGGT | 79     |      |     |
| KX118426.1_Alternaria_brassicicola_strain_BHU-LMMT15 | CCTTG      | -TCT       | TTTG       | -CGTA     | C          | ----- | TTC   | TTGTT | -T    | C      | CCTGGT | GGGT | 78     |      |     |
| KX118427.1_Alternaria_solani_strain_BHU-LMMT16       | CCTTG      | -TCT       | TTTG       | -CGTA     | C          | ----- | TTC   | TTGTT | -T    | C      | CCTGGT | GGGT | 79     |      |     |
| KX118424.1_Alternaria_brassicicola_strain_BHU-LMMT13 | CCTTG      | -TCT       | TTTG       | -CGTA     | C          | ----- | TTC   | TTGTT | -T    | C      | CCTGGT | GGGT | 79     |      |     |
| KX118414.1_Alternaria_alternata_strain_BHU-LMMT03    | CCTTG      | -TCT       | TTTG       | -CGTA     | C          | ----- | TTC   | TTGTT | -T    | C      | CCTGGT | GGGT | 80     |      |     |
| KX118423.1_Alternaria_brassicicola_strain_BHU-LMMT12 | CCTTG      | -TCT       | TTTG       | -CGTA     | C          | ----- | TTC   | TTGTT | -T    | C      | CCTGGT | GGGT | 80     |      |     |
| KX118412.1_Alternaria_alternata_strain_BHU-LMMT01    | CCTTG      | -TCT       | TTTG       | -CGTA     | C          | ----- | TTC   | TTGTT | -T    | C      | CCTGGT | GGGT | 78     |      |     |
| KX118417.1_Alternaria_alternata_strain_BHU-LMMT06    | CCTTG      | -TCT       | TTTG       | -CGTA     | C          | ----- | TTC   | TTGTT | -T    | C      | CCTGGT | GGGT | 80     |      |     |
| KX118420.1_Alternaria_alternata_strain_BHU-LMMT09    | CCTTG      | -TCT       | TTTG       | -CGTA     | C          | ----- | TTC   | TTGTT | -T    | C      | CCTGGT | GGGT | 80     |      |     |
| KX118422.1_Alternaria_brassicicola_strain_BHU-LMMT11 | CCTTG      | -TCT       | TTTG       | -CGTA     | CCGGGAT    | TTC   | TTGTT | -T    | C     | CCTGGT | GGGT   | 86   |        |      |     |
| KX179478.1_Alternaria_alternata_strain_BHU-LMMT35    | CCTTG      | -TCT       | TTTG       | -CGTA     | C          | ----- | TTC   | TTGTT | -T    | C      | CCTGGT | GGGT | 81     |      |     |
| KX118416.1_Alternaria_alternata_strain_BHU-LMMT05    | CCTTG      | -TCT       | TTTG       | -CGTA     | C          | ----- | TTC   | TTGTT | -T    | C      | CCTGGT | GGGT | 74     |      |     |
| KX179483.1_Alternaria_alternata_strain_BHU-LMMT40    | CCTTG      | -TCT       | TTTGAAC    | CGTA      | C          | ----- | TTC   | TTGTT | -T    | C      | CCTGGT | GGGT | 90     |      |     |
| KX179484.1_Alternaria_alternata_strain_BHU-LMMT41    | CCTTG      | -TCT       | TTTG       | -CGTA     | C          | ----- | TTC   | TTGTT | -T    | C      | CCTGGT | GGGT | 90     |      |     |
| KX179485.1_Alternaria_alternata_strain_BHU-LMMT42    | CCTTG      | -TCT       | TTTG       | -CGTA     | C          | ----- | TTC   | TTGTT | -T    | C      | CCTGGT | GGGT | 93     |      |     |
| KX179482.1_Alternaria_solani_strain_BHU-LMMT39       | CCTTG      | -TCT       | TTTG       | -CGTA     | C          | ----- | TTC   | TTGTT | -T    | C      | CCTGGT | GGGT | 88     |      |     |
| KX139158.1_Alternaria_tenuissima_strain_BHU-LMMT25   | CCTTG      | -TCT       | TTTG       | -CGTA     | C          | ----- | TTC   | TTGTT | -T    | C      | CCTGGT | GGGT | 95     |      |     |
| JQ070079.1                                           | CCTTG      | -TCT       | TTTG       | -CGTA     | C          | ----- | TTC   | TTGTT | -T    | C      | CCTGGT | GGGT | 118    |      |     |
| KX179480.1_Alternaria_alternata_strain_BHU-LMMT37    | CCTTG      | -TCT       | TTTG       | -CGTA     | C          | ----- | TTC   | TTGTT | -T    | C      | CCTGGT | GGGT | 116    |      |     |
| KX179479.1_Alternaria_alternata_strain_BHU-LMMT38    | CCTTG      | -TCT       | TTTG       | -CGTA     | C          | ----- | TTC   | TTGTT | -T    | C      | CCTGGT | GGGT | 110    |      |     |
| KX139153.1_Alternaria_brassicicola_strain_BHU-LMMT20 | CCTTG      | -TCT       | TTTG       | -CGTA     | C          | ----- | TTC   | TTGTT | -T    | C      | CCTGGT | GGGT | 129    |      |     |
| KX179489.1_Alternaria_alternata_strain_BHU-LMMT46    | CCTTG      | -TCT       | TTTG       | -CGTA     | C          | ----- | TTC   | TTGTT | -T    | C      | CCTGGT | GGGT | 129    |      |     |
| KX139163.1_Alternaria_eichhorniae_strain_BHU-LMMT30  | CCTTGGG    | TCT        | TTTG       | -CGTA     | C          | ----- | TTC   | T-GTT | -T    | C      | CCTGGT | GGGT | 103    |      |     |
| KX179488.1_Alternaria_alternata_strain_BHU-LMMT45    | CCTTG      | -TCT       | TTTG       | -CGTA     | C          | ----- | TTC   | TTGTT | -T    | C      | CCTGGT | GGGT | 103    |      |     |
| KX179481.1_Alternaria_solani_strain_BHU-LMMT38       | CCTTG      | -TCT       | TTTG       | -CGTA     | C          | ----- | TTC   | TTGTT | -T    | C      | CCTGGT | GGGT | 103    |      |     |
| KX179487.1_Alternaria_sp._2_MM-2016                  | CCTTG      | -TCT       | TTTG       | -CGTA     | C          | ----- | TTC   | TTGTT | -T    | C      | CCTGGT | GGGT | 113    |      |     |
| KX139164.1_Alternaria_eichhorniae_strain_BHU-LMMT31  | CCTTG      | -TCT       | TTTG       | -CGTA     | C          | ----- | TTC   | TTGTT | -T    | C      | CCTGGT | GGGT | 104    |      |     |
| KX179490.1_Alternaria_sp._3_MM-2016                  | CCTTG      | -TCT       | TTTG       | -CGTA     | C          | ----- | TTC   | TTGTT | -T    | C      | CCTGGT | GGGT | 143    |      |     |
| KX179477.1_Alternaria_alternata_strain_BHU-LMMT34    | CCTTG      | -TCT       | TTTG       | -CGTA     | C          | ----- | TTC   | TTGTT | -T    | C      | CCTGGT | GGGT | 115    |      |     |
| KX179486.1_Alternaria_sp._1_MM-2016                  | CCTTG      | -TCT       | TTTG       | -CGTA     | C          | ----- | TTC   | TTGTT | -T    | C      | CCTGGT | GGGT | 112    |      |     |
| KX179491.1_Alternaria_sp._4_MM-2016                  | CCTTG      | -TCT       | TTTG       | -CGTA     | C          | ----- | TTC   | TTGTT | -T    | C      | CCTGGT | GGGT | 150    |      |     |
| KX139154.1_Alternaria_brassicicola_strain_BHU-LMMT21 | CCGTG      | -TCT       | TTTG       | -CGTA     | C          | ----- | TTC   | TTGTT | -T    | C      | CCTGGT | GGGC | 153    |      |     |
| KX139152.1_Alternaria_brassicicola_strain_BHU-LMMT19 | CCGTG      | -TCT       | TTTG       | -CGTA     | C          | ----- | TTC   | TTGTT | -T    | C      | CCTGGT | GGGC | 74     |      |     |
| KX139165.1_Alternaria_macrospora_strain_BHU-LMMT32   | CCG        | -TGTCT     | TTTG       | -CGTA     | C          | ----- | TTC   | TTGTT | -T    | C      | CCTGGT | GGGC | 107    |      |     |
| KX139166.1_Alternaria_macrospora_strain_BHU-LMMT33   | CCGGG      | TGTCT      | TTTG       | -CGTA     | C          | ----- | TTC   | TTGTT | -T    | C      | CCTGGT | GGGC | 106    |      |     |
| KX139150.1_Alternaria_solani_strain_BHU-LMMT17       | CCG        | -TGTCT     | TTTG       | -CGTA     | C          | ----- | TTC   | TTGTT | -T    | C      | CCTGGT | GGGC | 84     |      |     |
| KX139151.1_Alternaria_solani_strain_BHU-LMMT18       | CCGTG      | -TCT       | TTTG       | -CGTA     | C          | ----- | TTC   | TTGTT | -T    | C      | CCTGGT | GGGC | 167    |      |     |
| KX139162.1_Alternaria_porri_strain_BHU-LMMT29        | CCGTG      | -TCT       | TTTG       | -GG       | -          | C     | ----- | T     | C     | TTGTT  | -T     | C    | CCTGGT | GGGC | 161 |
| KX139159.1_Alternaria_brassicicola_strain_BHU-LMMT26 | CCGTG      | -TCT       | TTTG       | -CGTA     | C          | ----- | TTC   | TTGTT | -T    | C      | CCTGGT | GGGC | 116    |      |     |
| KX139160.1_Alternaria_brassicicola_strain_BHU-LMMT27 | CCGTG      | -TCT       | TTTG       | -CGTA     | C          | ----- | TTC   | TTGTT | -T    | C      | CCTGGT | GGGC | 122    |      |     |
| KX139157.1_Alternaria_tenuissima_strain_BHU-LMMT24   | CCTTG      | -TCT       | TTTG       | -CGTA     | C          | ----- | TTC   | TTGTT | -T    | C      | CCTGGT | GGGT | 103    |      |     |
| KX139161.1_Alternaria_porri_strain_BHU-LMMT28        | CCATG      | -TCT       | TTTG       | -AGTA     | C          | ----- | -     | C     | TTCGT | -TTC   | CTCGGC | GGGT | 105    |      |     |
| KX139155.1_Alternaria_brassicicola_strain_BHU-LMMT23 | CCGCACGGGC | GCTACACTGA | CAGAGCCAAC | GAGTCTTTT | TTTTCAACGA |       |       |       |       |        |        |      | 81     |      |     |
| KX139156.1_Alternaria_brassicicola_strain_BHU-LMMT22 |            |            |            |           |            |       |       |       |       |        |        |      |        |      |     |

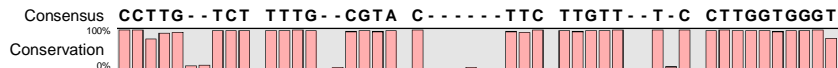



|                                                      | 260    | 280     | 300        |      |        |           |            |         |         |         |       |
|------------------------------------------------------|--------|---------|------------|------|--------|-----------|------------|---------|---------|---------|-------|
| KX118413.1_Alternaria_alternata_strain_BHU-LMMT02    | CAATC  | - AGC   | GTCAGTA    | - AC | AAAT   | - TAAT    | AATT       | - ACAAC | TTTCAA  | CAA     | - 162 |
| KX118415.1_Alternaria_alternata_strain_BHU-LMMT04    | CAATC  | - AGC   | GTCAGTA    | - AC | AAAT   | - TAAT    | AATT       | - ACAAC | TTTCAA  | CAA     | - 165 |
| KX118418.1_Alternaria_alternata_strain_BHU-LMMT07    | CAATC  | - AGC   | GTCAGTA    | - AC | AAAT   | - TAAT    | AATT       | - ACAAC | TTTCAA  | CAA     | - 163 |
| KX118419.1_Alternaria_alternata_strain_BHU-LMMT08    | CAATC  | - AGC   | GTCAGTA    | - AC | AAAT   | - TAAT    | AATT       | - ACAAC | TTTCAA  | CAA     | - 163 |
| KX118421.1_Alternaria_brassicicola_strain_BHU-LMMT10 | CAATC  | - AGC   | GTCAGTA    | - AC | AAAT   | - TAAT    | AATT       | - ACAAC | TTTCAA  | CAA     | - 162 |
| KX118425.1_Alternaria_brassicicola_strain_BHU-LMMT14 | CAATC  | - AGC   | GTCAGTA    | - AC | AAAT   | - TAAT    | AATT       | - ACAAC | TTTCAA  | CAA     | - 163 |
| KX118426.1_Alternaria_brassicicola_strain_BHU-LMMT15 | CAATC  | - AGC   | GTCAGTA    | - AC | AAAT   | - TAAT    | AATT       | - ACAAC | TTTCAA  | CAA     | - 162 |
| KX118427.1_Alternaria_solani_strain_BHU-LMMT16       | CAATC  | - AGC   | GTCAGTA    | - AC | AAAT   | - TAAT    | AATT       | - ACAAC | TTTCAA  | CAA     | - 163 |
| KX118424.1_Alternaria_brassicicola_strain_BHU-LMMT13 | CAATC  | - AGC   | GTCAGTA    | - AC | AAAT   | - TAAT    | AATT       | - ACAAC | TTTCAA  | CAA     | - 163 |
| KX118414.1_Alternaria_alternata_strain_BHU-LMMT03    | CAATC  | - AGC   | GTCAGTA    | - AC | AAAT   | - TAAT    | AATT       | - ACAAC | TTTCAA  | CAA     | - 164 |
| KX118423.1_Alternaria_brassicicola_strain_BHU-LMMT12 | CAATC  | - AGC   | GTCAGTA    | - AC | AAAT   | - TAAT    | AATT       | - ACAAC | TTTCAA  | CAA     | - 164 |
| KX118412.1_Alternaria_alternata_strain_BHU-LMMT01    | CAATC  | - AGC   | GTCAGTA    | - AC | AAAT   | - TAAT    | AATT       | - ACAAC | TTTCAA  | CAA     | - 160 |
| KX118417.1_Alternaria_alternata_strain_BHU-LMMT06    | CAATC  | - AGC   | GTCAGTA    | - AC | AAAT   | - TAAT    | AATT       | - ACAAC | TTTCAA  | CAA     | - 162 |
| KX118420.1_Alternaria_alternata_strain_BHU-LMMT09    | CAATC  | - AGC   | GTCAGTA    | - AC | AAAT   | - TAAT    | AATT       | - ACAAC | TTTCAA  | CAA     | - 162 |
| KX118422.1_Alternaria_brassicicola_strain_BHU-LMMT11 | CAATC  | - AGC   | GTCAGTA    | - AC | AAAT   | - TAAT    | AATT       | - ACAAC | TTTCAA  | CAA     | - 170 |
| KX179478.1_Alternaria_alternata_strain_BHU-LMMT35    | CAATC  | - AGC   | GTCAGTA    | - AC | AAAT   | - TAAT    | AATT       | - ACAAC | TTTCAA  | CAA     | - 163 |
| KX118416.1_Alternaria_alternata_strain_BHU-LMMT05    | CAATC  | - AGC   | GTCAGTA    | - AC | AAAT   | - TAAT    | AATT       | - ACAAC | TTTCAA  | CAA     | - 156 |
| KX179483.1_Alternaria_alternata_strain_BHU-LMMT40    | CAATC  | - AGC   | GTCAGTA    | - AC | AAAT   | - TAAT    | AATT       | - ACAAC | TTTCAA  | CAA     | - 172 |
| KX179484.1_Alternaria_alternata_strain_BHU-LMMT41    | CAATC  | - AGC   | GTCAGTA    | - AC | AAAT   | - TAAT    | AATT       | - ACAAC | TTTCAA  | CAA     | - 172 |
| KX179485.1_Alternaria_alternata_strain_BHU-LMMT42    | CAATC  | - AGC   | GTCAGTA    | - AC | AAAT   | - TAAT    | AATT       | - ACAAC | TTTCAA  | CAA     | - 175 |
| KX179482.1_Alternaria_solani_strain_BHU-LMMT39       | CAATC  | - AGC   | GTCAGTA    | - AC | AAAT   | - TAAT    | AATT       | - ACAAC | TTTCAA  | CAA     | - 170 |
| KX139158.1_Alternaria_tenuissima_strain_BHU-LMMT29   | CAATC  | - GC    | GTCAGTA    | - AC | AAAT   | - TAAT    | AATT       | - ACAAC | TTTCAA  | CAA     | - 179 |
| JQ070075.1                                           | CAATC  | - AGC   | GTCAGTA    | - AC | AAAT   | - TAAT    | AATT       | - ACAAC | TTTCAA  | CAA     | - 200 |
| KX179480.1_Alternaria_alternata_strain_BHU-LMMT37    | CAATC  | - AGC   | GTCAGTA    | - AC | AAAT   | - TAAT    | AATT       | - ACAAC | TTTCAA  | CAA     | - 198 |
| KX179479.1_Alternaria_alternata_strain_BHU-LMMT36    | CAATC  | - AGC   | GTCAGTA    | - AC | AAAT   | - TAAT    | AATT       | - ACAAC | TTTCAA  | CAA     | - 192 |
| KX139153.1_Alternaria_brassicicola_strain_BHU-LMMT20 | CAATC  | - AGC   | GTCAGTA    | - AC | AAAT   | - TAAT    | AATT       | - ACAAC | TTTCAA  | CAA     | - 214 |
| KX179489.1_Alternaria_alternata_strain_BHU-LMMT46    | CAATC  | - AGC   | GTCAGTA    | - AC | AAAT   | - TAAT    | AATT       | - ACAAC | TTTCAA  | CAA     | - 211 |
| KX139163.1_Alternaria_eichhorniae_strain_BHU-LMMT30  | CAATC  | - AGC   | GTCAGTA    | - AC | AAAT   | - TAAT    | AATT       | - ACAAC | TTTCAA  | CAA     | - 185 |
| KX179488.1_Alternaria_alternata_strain_BHU-LMMT45    | CAATC  | - AGC   | GTCAGTA    | - AC | AAAT   | - TAAT    | AATT       | - ACAAC | TTTCAA  | CAA     | - 185 |
| KX179481.1_Alternaria_solani_strain_BHU-LMMT38       | CAATC  | - AGC   | GTCAGTA    | - AC | AAAT   | - TAAT    | AATT       | - ACAAC | TTTCAA  | CAA     | - 185 |
| KX179487.1_Alternaria_sp._2_MM-2016                  | CAATC  | - AGC   | GTCAGTA    | - AC | AAAT   | - TAAT    | AATT       | - ACAAC | TTTCAA  | CAA     | - 195 |
| KX139164.1_Alternaria_eichhorniae_strain_BHU-LMMT31  | CAATC  | - AGC   | GTCAGTA    | - AC | AAAT   | - TAAT    | AATT       | - ACAAC | TTTCAA  | CAA     | - 186 |
| KX179490.1_Alternaria_sp._3_MM-2016                  | CAATC  | - AGC   | GTCAGTA    | - AC | AAAT   | - TAAT    | AATT       | - ACAAC | TTTCAA  | CAA     | - 225 |
| KX179477.1_Alternaria_alternata_strain_BHU-LMMT34    | CAATC  | - AGC   | GTCAGTA    | - AC | AAAT   | - TAAT    | AATT       | - ACAAC | TTTCAA  | CAA     | - 197 |
| KX179486.1_Alternaria_sp._1_MM-2016                  | CAATC  | - AGC   | GTCAGTA    | - AC | AAAT   | - TAAT    | AATT       | - ACAAC | TTTCAA  | CAA     | - 195 |
| KX179491.1_Alternaria_sp._4_MM-2016                  | CAATC  | - AGC   | GTCAGTA    | - AC | AAAT   | - TAAT    | AATT       | - ACAAC | TTTCAA  | CAA     | - 232 |
| KX139154.1_Alternaria_brassicicola_strain_BHU-LMMT21 | AAATC  | - AGC   | GTCAGTA    | - AC | AAAAAA | TAAT      | AATT       | - ACAAC | TTTCAA  | CAA     | - 239 |
| KX139152.1_Alternaria_brassicicola_strain_BHU-LMMT19 | AAATC  | - AGC   | GTCAGTA    | - AC | AAAA   | - TAAT    | AATT       | - ACAAC | TTTCAA  | CAA     | - 158 |
| KX139165.1_Alternaria_macrospora_strain_BHU-LMMT32   | CAATC  | - AGC   | GTCAGTA    | - AC | AA     | T - GTAAT | AATT       | - ACAAC | TTTCAA  | CAA     | - 192 |
| KX139166.1_Alternaria_macrospora_strain_BHU-LMMT33   | CAATC  | - AGC   | GTCAGTA    | - AC | AA     | T - GTAAT | AATT       | - ACAAC | TTTCAA  | CAA     | - 193 |
| KX139150.1_Alternaria_solani_strain_BHU-LMMT17       | CAATC  | - AGC   | GTCAGTA    | - AC | AA     | T - GCAAT | AATTTACAAC |         | TTTCAA  | CAA     | - 170 |
| KX139151.1_Alternaria_solani_strain_BHU-LMMT18       | CAATC  | - AGC   | GTCAGTA    | - AC | AA     | T - GTAAT | AATTTACAAC |         | TTTCAA  | CAA     | - 253 |
| KX139162.1_Alternaria_porri_strain_BHU-LMMT29        | CAATC  | - AGC   | GTCAGTA    | - AC | AA     | T - GTAAT | AATTTACAAC |         | TTTCAA  | CAA     | - 247 |
| KX139159.1_Alternaria_brassicicola_strain_BHU-LMMT26 | CAATC  | - AGC   | GTCAGTA    | - AC | AA     | CA - TAAT | AATT       | - ACAAC | TTTCAA  | CAA     | - 199 |
| KX139160.1_Alternaria_brassicicola_strain_BHU-LMMT27 | CAATC  | - AGC   | GTCAGTA    | - AC | AA     | CA - TAAT | AATT       | - ACAAC | TTTCAA  | CAA     | - 205 |
| KX139157.1_Alternaria_tenuissima_strain_BHU-LMMT24   | CAATC  | - T - T | GATGGTACAC |      | AAAT   | - TAAT    | AATT       | - ACAAC | TTGC    | - - CTT | 184   |
| KX139161.1_Alternaria_porri_strain_BHU-LMMT28        | CAATC  | - AGC   | GTCAGTA    | - AC | AA     | CTTTAAT   | AGTT       | - ACAAC | TTTCAA  | CAA     | - 189 |
| KX139155.1_Alternaria_brassicicola_strain_BHU-LMMT22 | CCTTTG | TACC    | GGAGGAAAAG |      | AA     | CCAACAG   | GGATTGCC   | - - - - | CTAGTAA |         | 176   |
| KX139156.1_Alternaria_brassicicola_strain_BHU-LMMT23 | CAATA  | - - AGC | GGAGGAAAAG |      | AA     | CCAACAG   | GGATTGCC   | - - - - | CTAGTAA |         | 48    |

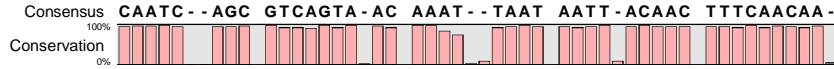

KX118413.1\_Alternaria\_alternata\_strain\_BHU-LMMT02 **CGGA** - - - **TCT** **CTTGGTT** - **CT** **GGCATCGA** - - - **TGA** - - **A-GA** **ACGCAGCGAA** 202  
 KX118415.1\_Alternaria\_alternata\_strain\_BHU-LMMT04 **CGGA** - - - **TCT** **CTTGGTT** - **CT** **GGCATCGA** - - - **TGA** - - **A-GA** **ACGCAGCGAA** 205  
 KX118418.1\_Alternaria\_alternata\_strain\_BHU-LMMT07 **CGGA** - - - **TCT** **CTTGGTT** - **CT** **GGCATCGA** - - - **TGA** - - **A-GA** **ACGCAGCGAA** 203  
 KX118419.1\_Alternaria\_alternata\_strain\_BHU-LMMT08 **CGGA** - - - **TCT** **CTTGGTT** - **CT** **GGCATCGA** - - - **TGA** - - **A-GA** **ACGCAGCGAA** 203  
 KX118421.1\_Alternaria\_brassicicola\_strain\_BHU-LMMT10 **CGGA** - - - **TCT** **CTTGGTT** - **CT** **GGCATCGA** - - - **TGA** - - **A-GA** **ACGCAGCGAA** 202  
 KX118425.1\_Alternaria\_brassicicola\_strain\_BHU-LMMT14 **CGGA** - - - **TCT** **CTTGGTT** - **CT** **GGCATCGA** - - - **TGA** - - **A-GA** **ACGCAGCGAA** 203  
 KX118426.1\_Alternaria\_brassicicola\_strain\_BHU-LMMT15 **CGGA** - - - **TCT** **CTTGGTT** - **CT** **GGCATCGA** - - - **TGA** - - **A-GA** **ACGCAGCGAA** 202  
 KX118427.1\_Alternaria\_solani\_strain\_BHU-LMMT16 **CGGA** - - - **TCT** **CTTGGTT** - **CT** **GGCATCGA** - - - **TGA** - - **A-GA** **ACGCAGCGAA** 203  
 KX118424.1\_Alternaria\_brassicicola\_strain\_BHU-LMMT13 **CGGA** - - - **TCT** **CTTGGTT** - **CT** **GGCATCGA** - - - **TGA** - - **A-GA** **ACGCAGCGAA** 203  
 KX118414.1\_Alternaria\_alternata\_strain\_BHU-LMMT03 **CGGA** - - - **TCT** **CTTGGTT** - **CT** **GGCATCGA** - - - **TGA** - - **A-GA** **ACGCAGCGAA** 204  
 KX118423.1\_Alternaria\_brassicicola\_strain\_BHU-LMMT12 **CGGA** - - - **TCT** **CTTGGTT** - **CT** **GGCATCGA** - - - **TGA** - - **A-GA** **ACGCAGCGAA** 204  
 KX118412.1\_Alternaria\_alternata\_strain\_BHU-LMMT01 **CGGA** - - - **TCT** **CTTGGTT** - **CT** **GGCATCGA** - - - **TGA** - - **A-GA** **ACGCAGCGAA** 200  
 KX118417.1\_Alternaria\_alternata\_strain\_BHU-LMMT06 **CGGA** - - - **TCT** **CTTGGTT** - **CT** **GGCATCGA** - - - **TGA** - - **A-GA** **ACGCAGCGAA** 202  
 KX118420.1\_Alternaria\_alternata\_strain\_BHU-LMMT09 **CGGA** - - - **TCT** **CTTGGTT** - **CT** **GGCATCGA** - - - **TGA** - - **A-GA** **ACGCAGCGAA** 202  
 KX118422.1\_Alternaria\_brassicicola\_strain\_BHU-LMMT11 **CGGA** - - - **TCT** **CTTGGTT** - **CT** **GGCATCGA** - - - **TGA** - - **A-GA** **ACGCAGCGAA** 210  
 KX179478.1\_Alternaria\_alternata\_strain\_BHU-LMMT35 **CGGA** - - - **TCT** **CTTGGTT** - **CT** **GGCATCGA** - - - **TGA** - - **A-GA** **ACGCAGCGAA** 203  
 KX118416.1\_Alternaria\_alternata\_strain\_BHU-LMMT05 **CGGA** - - - **TCT** **CTTGGTT** - **CT** **GGCATCGA** - - - **TGA** - - **A-GA** **ACGCAGCGAA** 196  
 KX179483.1\_Alternaria\_alternata\_strain\_BHU-LMMT40 **CGGA** - - - **TCT** **CTTGGTT** - **CT** **GGCATCGA** - - - **TGA** - - **A-GA** **ACGCAGCGAA** 212  
 KX179484.1\_Alternaria\_alternata\_strain\_BHU-LMMT41 **CGGA** - - - **TCT** **CTTGGTT** - **CT** **GGCATCGA** - - - **TGA** - - **A-GA** **ACGCAGCGAA** 212  
 KX179485.1\_Alternaria\_alternata\_strain\_BHU-LMMT42 **CGGA** - - - **TCT** **CTTGGTT** - **CT** **GGCATCGA** - - - **TGA** - - **A-GA** **ACGCAGCGAA** 215  
 KX179482.1\_Alternaria\_solani\_strain\_BHU-LMMT39 **CGGA** - - - **TCT** **CTTGGTT** - **CT** **GGCATCGA** - - - **TGA** - - **A-GA** **ACGCAGCGAA** 210  
 KX139158.1\_Alternaria\_tenuissima\_strain\_BHU-LMMT25 **CGGA** - - - **TCT** **CTTGGTT** - **CT** **GGCATCGA** - - - **TGA** - - **A-GA** **ACGCAGCGAA** 219  
 JQ070079.1 **CGGA** - - - **TCT** **CTTGGTT** - **CT** **GGCATCGA** - - - **TGA** - - **A-GA** **ACGCAGCGAA** 240  
 KX179480.1\_Alternaria\_alternata\_strain\_BHU-LMMT37 **CGGA** - - - **TCT** **CTTGGTT** - **CT** **GGCATCGA** - - - **TGA** - - **A-GA** **ACGCAGCGAA** 238  
 KX179479.1\_Alternaria\_alternata\_strain\_BHU-LMMT36 **CGGA** - - - **TCT** **CTTGGTT** - **CT** **GGCATCGA** - - - **TGA** - - **A-GA** **ACGCAGCGAA** 232  
 KX139153.1\_Alternaria\_brassicicola\_strain\_BHU-LMMT20 **CGGA** - - - **TCT** **CTTGGTT** - **CT** **GGCATCGA** - - - **TGA** - - **A-GA** **ACGCAGCGAA** 254  
 KX179489.1\_Alternaria\_alternata\_strain\_BHU-LMMT46 **CGGA** - - - **TCT** **CTTGGTT** - **CT** **GGCATCGA** - - - **TGA** - - **A-GA** **ACGCAGCGAA** 251  
 KX139163.1\_Alternaria\_eichhorniae\_strain\_BHU-LMMT30 **CGGA** - - - **TCT** **CTTGGTT** - **CT** **GGCATCGA** - - - **TGACCA**-GA **ACGCAGCGAA** 227  
 KX179488.1\_Alternaria\_alternata\_strain\_BHU-LMMT45 **CGGA** - - - **TCT** **CTTGGTT** - **CT** **GGCATCGA** - - - **TGA** - - **A-GA** **ACGCAGCGAA** 225  
 KX179481.1\_Alternaria\_solani\_strain\_BHU-LMMT38 **CGGA** - - - **TCT** **CTTGGTT** - **CT** **GGCATCGA** - - - **TGA** - - **A-GA** **ACGCAGCGAA** 225  
 KX179487.1\_Alternaria\_sp.\_2\_MM-2016 **CGGA** - - - **TCT** **CTTGGTT** - **CT** **GGCATCGA** - - - **TGA** - - **A-GA** **ACGCAGCGAA** 235  
 KX139164.1\_Alternaria\_eichhorniae\_strain\_BHU-LMMT31 **CGGA** - - - **TCT** **CTTGGTT** - **CT** **GGCATCGA** - - - **TGA** - - **A-GA** **ACGCAGCGAA** 226  
 KX179490.1\_Alternaria\_sp.\_3\_MM-2016 **CGGA** - - - **TCT** **CTTGGTT** - **CT** **GGCATCGA** - - - **TGA** - - **A-GA** **ACGCAGCGAA** 265  
 KX179477.1\_Alternaria\_alternata\_strain\_BHU-LMMT34 **CGGA** - - - **TCT** **CTTGGTT** - **CT** **GGCATCGA** - - - **TGA** - - **A-GA** **ACGCAGCGAA** 238  
 KX179486.1\_Alternaria\_sp.\_1\_MM-2016 **CGGA** - - - **TCT** **CTTGGTT** - **CT** **GGCATCGA** - - - **TGA** - - **A-GA** **ACGCAGCGAA** 235  
 KX179491.1\_Alternaria\_sp.\_4\_MM-2016 **CGGA** - - - **TCT** **CTTGGTT** - **CT** **GGCATCGA** - - - **TGA** - - **A-GA** **ACGCAGCGAA** 272  
 KX139154.1\_Alternaria\_brassicicola\_strain\_BHU-LMMT21 **CGGA** - - - **TCT** **CTTGGTT** - **CT** **GGCATCGA** - - - **TGA** - - **A-GA** **ACGCAGCGAA** 279  
 KX139152.1\_Alternaria\_brassicicola\_strain\_BHU-LMMT19 **CGGA** - - - **TCT** **CTTGGTT** - **CT** **GGCATCGA** - - - **TGA** - - **A-GA** **ACGCAGCGAA** 198  
 KX139165.1\_Alternaria\_macrospora\_strain\_BHU-LMMT32 **CGGA** - - - **TCT** **CTTGGTT** - **CT** **GGCATCGA** - - - **TGA** - - **A-GA** **ACGCAGCGAA** 232  
 KX139166.1\_Alternaria\_macrospora\_strain\_BHU-LMMT33 **CGGA** - - - **TCT** **CTTGGTT** - **CT** **GGCATCGA** - - - **TGA** - - **A-GA** **ACGCAGCGAA** 233  
 KX139150.1\_Alternaria\_solani\_strain\_BHU-LMMT17 **CGGA** - - - **TCT** **CTTGGTT** - **CT** **GGCATCGA** - - - **TGA** - - **A-GA** **ACGCAGCGAA** 210  
 KX139151.1\_Alternaria\_solani\_strain\_BHU-LMMT18 **CGGA** - - - **TCT** **CTTGGTT** - **CT** **GGCATCGA** - - - **TGAAGA**-AA **ACGCAGCGAA** 295  
 KX139162.1\_Alternaria\_porri\_strain\_BHU-LMMT29 **CGGA** - - - **TCT** **CTTGGTT** - **CT** **GGCATCGA** - - - **TGAAGA**-A - **CGCAGCGAA** 287  
 KX139159.1\_Alternaria\_brassicicola\_strain\_BHU-LMMT26 **CGGA** - - - **TCT** **CTTGGTT** - **CT** **GGCATCGA** - - - **TGA** - - **A-GA** **ACGCAGCGAA** 239  
 KX139160.1\_Alternaria\_brassicicola\_strain\_BHU-LMMT27 **CGGA** - - - **TCT** **CTTGGTT** - **CT** **GGCATCGA** - - - **TGA** - - **A-GA** **ACGCAGCGAA** 245  
 KX139157.1\_Alternaria\_tenuissima\_strain\_BHU-LMMT24 **TGGA** - - - **TCT** **CTTGGTT** - **CT** **GGCTGCGA** - - - **TTA** - - **A-AA** **ACACACCGAAA** 224  
 KX139161.1\_Alternaria\_porri\_strain\_BHU-LMMT28 **CGGA** - - - **TCT** **CTTGGTT** - **CT** **GGCATCGA** - - - **TGA** - - **A-GA** **ACGCAGCGAA** 229  
 KX139155.1\_Alternaria\_brassicicola\_strain\_BHU-LMMT22 **GGCGGAGTGA** **AGCGGCAACA** **GC** - - **TCAAAT** **TTGAAATCTG** **GCTCTTTTAG** 98  
 KX139156.1\_Alternaria\_brassicicola\_strain\_BHU-LMMT23 **GGCGGAGTGA** **AGCGGCAACA** **GCCCTCAAAT** **TTGAAATCTG** **GCTCTTTTAG** 98  
 Consensus **CGGA** - - - **TCT** **CTTGGTT** - **CT** **GGCATCGA** - - - **TGA** - - **A-GA** **ACGCAGCGAA**

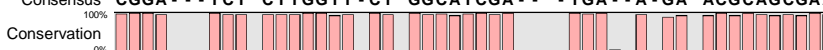

|                                                      | 360                                                                                  | 380          | 400        |                                    |
|------------------------------------------------------|--------------------------------------------------------------------------------------|--------------|------------|------------------------------------|
| KX118413.1_Alternaria_alternata_strain_BHU-LMMT02    | A - - TGGGATA                                                                        | AGTAGTGTGA   | ATTGCAGAAT | TCAGTGAATC ATCGAA - TCT 249        |
| KX118415.1_Alternaria_alternata_strain_BHU-LMMT04    | A - - TGGGATA                                                                        | AGTAGTGTGA   | ATTGCAGAAT | TCAGTGAATC ATCGAA - TCT 252        |
| KX118418.1_Alternaria_alternata_strain_BHU-LMMT07    | A - - TGGGATA                                                                        | AGTAGTGTGA   | ATTGCAGAAT | TCAGTGAATC ATCGAA - TCT 250        |
| KX118419.1_Alternaria_alternata_strain_BHU-LMMT08    | A - - TGGGATA                                                                        | AGTAGTGTGA   | ATTGCAGAAT | TCAGTGAATC ATCGAA - TCT 250        |
| KX118421.1_Alternaria_brassicicola_strain_BHU-LMMT10 | A - - TGGGATA                                                                        | AGTAGTGTGA   | ATTGCAGAAT | TCAGTGAATC ATCGAA - TCT 249        |
| KX118425.1_Alternaria_brassicicola_strain_BHU-LMMT14 | A - - TGGGATA                                                                        | AGTAGTGTGA   | ATTGCAGAAT | TCAGTGAATC ATCGAA - TCT 250        |
| KX118426.1_Alternaria_brassicicola_strain_BHU-LMMT15 | A - - TGGGATA                                                                        | AGTAGTGTGA   | ATTGCAGAAT | TCAGTGAATC ATCGAA - TCT 249        |
| KX118427.1_Alternaria_solani_strain_BHU-LMMT16       | A - - TGGGATA                                                                        | AGTAGTGTGA   | ATTGCAGAAT | TCAGTGAATC ATCGAA - TCT 250        |
| KX118424.1_Alternaria_brassicicola_strain_BHU-LMMT13 | A - - TGGGATA                                                                        | AGTAGTGTGA   | ATTGCAGAAT | TCAGTGAATC ATCGAA - TCT 250        |
| KX118414.1_Alternaria_alternata_strain_BHU-LMMT03    | A - - TGGGATA                                                                        | AGTAGTGTGA   | ATTGCAGAAT | TCAGTGAATC ATCGAA - TCT 251        |
| KX118423.1_Alternaria_brassicicola_strain_BHU-LMMT12 | A - - TGGGATA                                                                        | AGTAGTGTGA   | ATTGCAGAAT | TCAGTGAATC ATCGAA - TCT 251        |
| KX118412.1_Alternaria_alternata_strain_BHU-LMMT01    | A - - TGGGATA                                                                        | AGTAGTGTGA   | ATTGCAGAAT | TCAGTGAATC ATCGAA - TCT 247        |
| KX118417.1_Alternaria_alternata_strain_BHU-LMMT06    | A - - TGGGATA                                                                        | AGTAGTGTGA   | ATTGCAGAAT | TCAGTGAATC ATCGAA - TCT 249        |
| KX118420.1_Alternaria_alternata_strain_BHU-LMMT09    | A - - TGGGATA                                                                        | AGTAGTGTGA   | ATTGCAGAAT | TCAGTGAATC ATCGAA - TCT 249        |
| KX118422.1_Alternaria_brassicicola_strain_BHU-LMMT11 | A - - TGGGATA                                                                        | AGTAGTGTGA   | ATTGCAGAAT | TCAGTGAATC ATCGAA - TCT 257        |
| KX179478.1_Alternaria_alternata_strain_BHU-LMMT35    | A - - TGGGATA                                                                        | AGTAGTGTGA   | ATTGCAGAAT | TCAGTGAATC ATCGAA - TCT 250        |
| KX118416.1_Alternaria_alternata_strain_BHU-LMMT05    | A - - TGGGATA                                                                        | AGTAGTGTGA   | ATTGCAGAAT | TCAGTGAATC ATCGAA - TCT 243        |
| KX179483.1_Alternaria_alternata_strain_BHU-LMMT40    | A - - TGGGATA                                                                        | AGTAGTGTGA   | ATTGCAGAAT | TCAGTGAATC ATCGAA - TCT 259        |
| KX179484.1_Alternaria_alternata_strain_BHU-LMMT41    | A - - TGGGATA                                                                        | AGTAGTGTGA   | ATTGCAGAAT | TCAGTGAATC ATCGAA - TCT 259        |
| KX179485.1_Alternaria_alternata_strain_BHU-LMMT42    | A - - TGGGATA                                                                        | AGTAGTGTGA   | ATTGCAGAAT | TCAGTGAATC ATCGAA - TCT 262        |
| KX179482.1_Alternaria_solani_strain_BHU-LMMT39       | A - - TGGGATA                                                                        | AGTAGTGTGA   | ATTGCAGAAT | TCAGTGAATC ATCGAA - TCT 257        |
| KX139158.1_Alternaria_tenuissima_strain_BHU-LMMT25   | A - - TGGGATA                                                                        | AGTAGTGTGA   | ATTGCAGAAT | TCAGTGAATC ATCGAA - TCT 266        |
| JQ070079.1                                           | A - - TGGGATA                                                                        | AGTAGTGTGA   | ATTGCAGAAT | TCAGTGAATC ATCGAA - TCT 287        |
| KX179480.1_Alternaria_alternata_strain_BHU-LMMT37    | A - - TGGGATA                                                                        | AGTAGTGTGA   | ATTGCAGAAT | TCAGTGAATC ATCGAA - TCT 285        |
| KX179479.1_Alternaria_alternata_strain_BHU-LMMT36    | A - - TGGGATA                                                                        | AGTAGTGTGA   | ATTGCAGAAT | TCAGTGAATC ATCGAA - TCT 279        |
| KX139153.1_Alternaria_brassicicola_strain_BHU-LMMT20 | A - - TGGGATA                                                                        | AGTAGTGTGA   | ATTGCAGAAT | TCAGTGAATC ATCGAA - TCT 301        |
| KX179489.1_Alternaria_alternata_strain_BHU-LMMT46    | A - - TGGGATA                                                                        | AGTAGTGTGA   | ATTGCAGAAT | TCAGTGAATC ATCGAA - TCT 298        |
| KX139163.1_Alternaria_eichhorniae_strain_BHU-LMMT30  | A - - TGGGATA                                                                        | AGTAGTGTGA   | ATTGCAGAAT | TCAGTGAATC ATCGAA - TCT 274        |
| KX179488.1_Alternaria_alternata_strain_BHU-LMMT45    | A - - TGGGATA                                                                        | AGTAGTGTGA   | ATTGCAGAAT | TCAGTGAATC ATCGAA - TCT 272        |
| KX179481.1_Alternaria_solani_strain_BHU-LMMT38       | A - - TGGGATA                                                                        | AGTAGTGTGA   | ATTGCAGAAT | TCAGTGAATC ATCGAA - TCT 272        |
| KX179487.1_Alternaria_sp._2_MM-2016                  | A - - TGGGATA                                                                        | AGTAGTGTGA   | ATTGCAGAAT | TCAGTGAATC ATCGAA - TCT 282        |
| KX139164.1_Alternaria_eichhorniae_strain_BHU-LMMT31  | A - - TGGGATA                                                                        | AGTAGTGTGA   | ATTGCAGAAT | TCAGTGAATC ATCGAA - TCT 273        |
| KX179490.1_Alternaria_sp._3_MM-2016                  | A - - TGGGATA                                                                        | AGTAGTGTGA   | ATTGCAGAAT | TCAGTGAATC ATCGAA - TCT 312        |
| KX179477.1_Alternaria_alternata_strain_BHU-LMMT34    | A - - TGGGATA                                                                        | AGTAGTGTGA   | ATTGCAGAAT | TCAGTGAATC ATCGAA - TCT 286        |
| KX179486.1_Alternaria_sp._1_MM-2016                  | A - - TGGGATA                                                                        | AGTAGTGTGA   | ATTGCAGAAT | TCAGTGAATC ATCGAA - TCT 282        |
| KX179491.1_Alternaria_sp._4_MM-2016                  | A - - TGGGATA                                                                        | AGTAGTGTGA   | ATTGCAGAAT | TCAGTGAATC ATCGAA - TCT 319        |
| KX139154.1_Alternaria_brassicicola_strain_BHU-LMMT21 | A - - TGGGATA                                                                        | AGTAGTGTGA   | ATTGCAGAAT | TCAGTGAATC ATCGAA - TCT 326        |
| KX139152.1_Alternaria_brassicicola_strain_BHU-LMMT19 | A - - TGGGATA                                                                        | AGTAGTGTGA   | ATTGCAGAAT | TCAGTGAATC ATCGAA - TCT 245        |
| KX139165.1_Alternaria_macrospora_strain_BHU-LMMT32   | A - - TGGGATA                                                                        | AGTAGTGTGA   | ATTGCAGAAT | TCAGTGAATC ATCGAA - TCT 279        |
| KX139166.1_Alternaria_macrospora_strain_BHU-LMMT33   | A - - TGGGATA                                                                        | AGTAGTGTGA   | ATTGCAGAAT | TCAGTGAATC ATCGAA - TCT 280        |
| KX139150.1_Alternaria_solani_strain_BHU-LMMT17       | AGG TGGGATA                                                                          | AGTAGTGTGA   | ATTGCAGAAT | TCAGTGAATC ATCGAA - TCT 259        |
| KX139151.1_Alternaria_solani_strain_BHU-LMMT18       | A - - TGGGATA                                                                        | AGTAGTGTGA   | ATTGCAGAAT | TCAGTGAATC ATCGAA - TCT 342        |
| KX139162.1_Alternaria_porri_strain_BHU-LMMT29        | A - - TGGGATA                                                                        | AGTAGTGTGA   | ATTGCAGAAT | TCAGTGAATC ATCGAA - TCT 334        |
| KX139159.1_Alternaria_brassicicola_strain_BHU-LMMT26 | A - - TGGGATA                                                                        | AGTAGTGTGA   | ATTGCAGAAT | TCAGTGAATC ATCGAA - TCT 286        |
| KX139160.1_Alternaria_brassicicola_strain_BHU-LMMT27 | A - - TGGGATA                                                                        | AGTAGTGTGA   | ATTGCAGAAT | TCAGTGAATC ATCGAA - TCT 292        |
| KX139157.1_Alternaria_tenuissima_strain_BHU-LMMT24   | A - - TGGGATA                                                                        | AGTTCGTGTGA  | ATTGCAGAAT | TCT - CGAATC ATCGAA - TCT 270      |
| KX139161.1_Alternaria_porri_strain_BHU-LMMT28        | A - - TGGGATA                                                                        | AGTAGTGTGA   | ATTGCAGAAT | TCAGTGAATC ATCGAA - TCT 276        |
| KX139155.1_Alternaria_brassicicola_strain_BHU-LMMT22 | AG - TCCGA - -                                                                       | -GT - -TGTAA | TTTGCAGAGG | GCG - - - - - C TTTGG - - - CT 259 |
| KX139156.1_Alternaria_brassicicola_strain_BHU-LMMT23 | AG - TCCGA - -                                                                       | -GT - -TGTAA | TTTGCAGAGG | GCG - - - - - C TTTGG - - - CT 133 |
| Consensus                                            | A - - TGGGATA                                                                        | AGTAGTGTGA   | ATTGCAGAAT | TCAGTGAATC ATCGAA - TCT            |
| Conservation                                         |  |              |            |                                    |



KX118413.1\_Alternaria\_alternata\_strain\_BHU-LMMT02 TTGAA -CG - -CA - - -CA TT -GCGCCCT TTGGTATTC -CAAAGGG-CA 287  
 KX118415.1\_Alternaria\_alternata\_strain\_BHU-LMMT04 TTGAA -CG - -CA - - -CA TT -GCGCCCT TTGGTATTC -CAAAGGG-CA 290  
 KX118418.1\_Alternaria\_alternata\_strain\_BHU-LMMT07 TTGAA -CG - -CA - - -CA TT -GCGCCCT TTGGTATTC -CAAAGGG-CA 288  
 KX118419.1\_Alternaria\_alternata\_strain\_BHU-LMMT08 TTGAA -CG - -CA - - -CA TT -GCGCCCT TTGGTATTC -CAAAGGG-CA 288  
 KX118421.1\_Alternaria\_brassicicola\_strain\_BHU-LMMT10 TTGAA -CG - -CA - - -CA TT -GCGCCCT TTGGTATTC -CAAAGGG-CA 287  
 KX118425.1\_Alternaria\_brassicicola\_strain\_BHU-LMMT14 TTGAA -CG - -CA - - -CA TT -GCGCCCT TTGGTATTC -CAAAGGG-CA 288  
 KX118426.1\_Alternaria\_brassicicola\_strain\_BHU-LMMT15 TTGAA -CG - -CA - - -CA TT -GCGCCCT TTGGTATTC -CAAAGGG-CA 287  
 KX118427.1\_Alternaria\_solani\_strain\_BHU-LMMT16 TTGAA -CG - -CA - - -CA TT -GCGCCCT TTGGTATTC -CAAAGGG-CA 288  
 KX118424.1\_Alternaria\_brassicicola\_strain\_BHU-LMMT13 TTGAA -CG - -CA - - -CA TT -GCGCCCT TTGGTATTC -CAAAGGG-CA 288  
 KX118414.1\_Alternaria\_alternata\_strain\_BHU-LMMT03 TTGAA -CG - -CA - - -CA TT -GCGCCCT TTGGTATTC -CAAAGGG-CA 289  
 KX118423.1\_Alternaria\_brassicicola\_strain\_BHU-LMMT12 TTGAA -CG - -CA - - -CA TT -GCGCCCT TTGGTATTC -CAAAGGG-CA 289  
 KX118412.1\_Alternaria\_alternata\_strain\_BHU-LMMT01 TTGAA -CG - -CA - - -CA TT -GCGCCCT TTGGTATTC -CAAAGGG-CA 285  
 KX118417.1\_Alternaria\_alternata\_strain\_BHU-LMMT06 TTGAA -CG - -CA - - -CA TT -GCGCCCT TTGGTATTC -CAAAGGG-CA 287  
 KX118420.1\_Alternaria\_alternata\_strain\_BHU-LMMT09 TTGAA -CG - -CA - - -CA TT -GCGCCCT TTGGTATTC -CAAAGGG-CA 287  
 KX118422.1\_Alternaria\_brassicicola\_strain\_BHU-LMMT11 TTGAA -CG - -CA - - -CA TT -GCGCCCT TTGGTATTC -CAAAGGG-CA 295  
 KX179478.1\_Alternaria\_alternata\_strain\_BHU-LMMT35 TTGAA -CG - -CA - - -CA TT -GCGCCCT TTGGTATTC -CAAAGGG-CA 288  
 KX118416.1\_Alternaria\_alternata\_strain\_BHU-LMMT05 TTGAA -CG - -CA - - -CA TT -GCGCCCT TTGGTATTC -CAAAGGG-CA 281  
 KX179483.1\_Alternaria\_alternata\_strain\_BHU-LMMT40 TTGAA -CG - -CA - - -CA TT -GCGCCCT TTGGTATTC -CAAAGGG-CA 297  
 KX179484.1\_Alternaria\_alternata\_strain\_BHU-LMMT41 TTGAA -CG - -CA - - -CA TT -GCGCCCT TTGGTATTC -CAAAGGG-CA 297  
 KX179485.1\_Alternaria\_alternata\_strain\_BHU-LMMT42 TTGAA -CG - -CA - - -CA TT -GCGCCCT TTGGTATTC -CAAAGGG-CA 300  
 KX179482.1\_Alternaria\_solani\_strain\_BHU-LMMT39 TTGAA -CG - -CA - - -CA TT -GCGCCCT TTGGTATTC -CAAAGGG-CA 295  
 KX139158.1\_Alternaria\_tenuissima\_strain\_BHU-LMMT25 TTGAA -CG - -CA - - -CA TT -GCGCCCT TTGGTATTC -CAAAGGG-CA 304  
 JQ070079.1 TTGAA -CG - -CA - - -CA TT -GCGCCCT TTGGTATTC -CAAAGGG-CA 325  
 KX179480.1\_Alternaria\_alternata\_strain\_BHU-LMMT37 TTGAA -CG - -CA - - -CA TT -GCGCCCT TTGGTATTC -CAAAGGG-CA 323  
 KX179479.1\_Alternaria\_alternata\_strain\_BHU-LMMT36 TTGAA -CG - -CA - - -CA TT -GCGCCCT TTGGTATTC -CAAAGGG-CA 317  
 KX139153.1\_Alternaria\_brassicicola\_strain\_BHU-LMMT20 TTGAA -CG - -CA - - -CA TT -GCGCCCT TTGGTATTC -CAAAGGG-CA 339  
 KX179489.1\_Alternaria\_alternata\_strain\_BHU-LMMT46 TTGAA -CG - -CA - - -CA TT -GCGCCCT TTGGTATTC -CAAAGGG-CA 336  
 KX139163.1\_Alternaria\_eichhorniae\_strain\_BHU-LMMT30 TTGAA -CG - -CA - - -CA TT -GCGCCCT TTGGTATTC -CAAAGGG-CA 312  
 KX179488.1\_Alternaria\_alternata\_strain\_BHU-LMMT45 TTGAA -CG - -CA - - -CA TT -GCGCCCT TTGGTATTC -CAAAGGG-CA 310  
 KX179481.1\_Alternaria\_solani\_strain\_BHU-LMMT38 TTGAA -CG - -CA - - -CA TT -GCGCCCT TTGGTATTC -CAAAGGG-CA 310  
 KX179487.1\_Alternaria\_sp.\_2\_MM-2016 TTGAA -CG - -CA - - -CA TT -GCGCCCT TTGGTATTC -CAAAGGG-CA 320  
 KX139164.1\_Alternaria\_eichhorniae\_strain\_BHU-LMMT31 TTGAA -CG - -CAAA - -CA TT -GCGCCCT TTGGTATTC -CAAAGGG-CA 313  
 KX179490.1\_Alternaria\_sp.\_3\_MM-2016 TTGAA -CG - -CA - - -CA TT -GCGCCCT TTGGTATTC -CAAAGGG-CA 350  
 KX179477.1\_Alternaria\_alternata\_strain\_BHU-LMMT34 TTGAA -CG - -CA - - -CA TT -GCGCCCT TTGGTATTC -CAAAGGG-CA 324  
 KX179486.1\_Alternaria\_sp.\_1\_MM-2016 TTGAA -CG - -CA - - -CA TT -GCGCCCT TTGGTATTC -CAAAGGG-CA 320  
 KX179491.1\_Alternaria\_sp.\_4\_MM-2016 TTGAA -CG - -CA - - -CA TT -GCGCCCT TTGGTATTC -CAAAGGG-CA 357  
 KX139154.1\_Alternaria\_brassicicola\_strain\_BHU-LMMT21 TTGAA -CG - -CA - - -CA TT -GCGCCCT TTGGTATTC -CAAAGGG-CA 364  
 KX139152.1\_Alternaria\_brassicicola\_strain\_BHU-LMMT19 TTGAA -CG - -CA - - -CA TT -GCGCCCT TTGGTATTC -CAAAGGG-CA 284  
 KX139165.1\_Alternaria\_macrospora\_strain\_BHU-LMMT32 TTGAA -CG - -CA - - -CA TT -GCGCCCT TTGGTATTC -CAAAGGG-CA 317  
 KX139166.1\_Alternaria\_macrospora\_strain\_BHU-LMMT33 TTGAAAAGCG - -CA - - -CA TT -GCGCCCT TTGGTATTC -CAAAGGG-CA 320  
 KX139150.1\_Alternaria\_solani\_strain\_BHU-LMMT17 TTGAA -CG - -CA - - -CA TT -GCGCCCT TTGGTATTC -CAAAGGG-CA 297  
 KX139151.1\_Alternaria\_solani\_strain\_BHU-LMMT18 TTGAA -CG - -CA - - -CA TT -GCGCCCT TTGGTATTC -CAAAGGG-CA 380  
 KX139162.1\_Alternaria\_porri\_strain\_BHU-LMMT29 TTGAA -CG - -CA - - -CA TT -GCGCCCT TTGGTATTC -CAAAGGG-CA 372  
 KX139159.1\_Alternaria\_brassicicola\_strain\_BHU-LMMT26 TTGAA -CG - -CA - - -CA TT -GCGCCCT TTGGTATTC -CAAAGGG-CA 324  
 KX139160.1\_Alternaria\_brassicicola\_strain\_BHU-LMMT27 TTGAA -CG - -CA - - -CA TT -GCGCCCT TTGGTATTC -CAAAGGG-CA 330  
 KX139157.1\_Alternaria\_tenuissima\_strain\_BHU-LMMT24 TTGAA -CG - -CA - - -CA TT -GCGCCCT TTGGTATTC -CAAAGGG-CA 309  
 KX139161.1\_Alternaria\_porri\_strain\_BHU-LMMT28 TTGAACGGG - -CA - - -CA TT -GCGCCCT TTGGTATTC -CATGGGG-CA 316  
 KX139155.1\_Alternaria\_brassicicola\_strain\_BHU-LMMT22 TTGGCAGCGG TCCAAGTTC TTGGAACA - - -GGAAGTCA CAGAGGGTGA 305  
 KX139156.1\_Alternaria\_brassicicola\_strain\_BHU-LMMT23 TTGGCAGCGG TCCAAGTTC TTGGAACA - - -GGAAGTCA CAGAGGGTGA 179

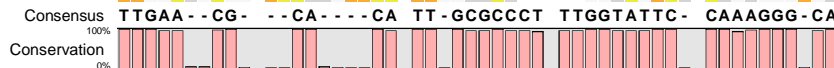

|                                                      | 460         | 480          | 500                        |                   |                |
|------------------------------------------------------|-------------|--------------|----------------------------|-------------------|----------------|
| KX118413.1_Alternaria_alternata_strain_BHU-LMMT02    | TG - CCTGTT | CGAG - - - C | GTCATTTG - - - TA - - - CC | G - TCAA - GC 319 |                |
| KX118415.1_Alternaria_alternata_strain_BHU-LMMT04    | TG - CCTGTT | CGAG - - - C | GTCATTTG - - - TA - - - CC | C - TCAA - GC 322 |                |
| KX118418.1_Alternaria_alternata_strain_BHU-LMMT07    | TG - CCTGTT | CGAG - - - C | GTCATTTG - - - TA - - - CC | C - TCAA - GC 320 |                |
| KX118419.1_Alternaria_alternata_strain_BHU-LMMT08    | TG - CCTGTT | CGAG - - - C | GTCATTTG - - - TA - - - CC | C - TCAA - GC 320 |                |
| KX118421.1_Alternaria_brassicicola_strain_BHU-LMMT10 | TG - CCTGTT | CGAG - - - C | GTCATTTG - - - TA - - - CC | G - TCAA - GC 319 |                |
| KX118425.1_Alternaria_brassicicola_strain_BHU-LMMT14 | TG - CCTGTT | CGAG - - - C | GTCATTTG - - - TA - - - CC | C - TCAA - GC 320 |                |
| KX118426.1_Alternaria_brassicicola_strain_BHU-LMMT15 | TG - CCTGTT | CGAG - - - C | GTCATTTG - - - TA - - - CC | C - TCAA - GC 319 |                |
| KX118427.1_Alternaria_solani_strain_BHU-LMMT16       | TG - CCTGTT | CGAG - - - C | GTCATTTG - - - TA - - - CC | C - TCAA - GC 320 |                |
| KX118424.1_Alternaria_brassicicola_strain_BHU-LMMT13 | TG - CCTGTT | CGAG - - - C | GTCATTTG - - - TA - - - CC | G - TCAA - GC 320 |                |
| KX118414.1_Alternaria_alternata_strain_BHU-LMMT03    | TG - CCTGTT | CGAG - - - C | GTCATTTG - - - TA - - - CC | C - TCAA - GC 321 |                |
| KX118423.1_Alternaria_brassicicola_strain_BHU-LMMT12 | TG - CCTGTT | CGAG - - - C | GTCATTTG - - - TA - - - CC | C - TCAA - GC 321 |                |
| KX118412.1_Alternaria_alternata_strain_BHU-LMMT01    | TG - CCTGTT | CGAG - - - C | GTCATTTG - - - TA - - - CC | C - TCAA - GC 317 |                |
| KX118417.1_Alternaria_alternata_strain_BHU-LMMT06    | TG - CCTGTT | CGAG - - - C | GTCATTTG - - - TA - - - CC | G - TCAA - GC 319 |                |
| KX118420.1_Alternaria_alternata_strain_BHU-LMMT09    | TG - CCTGTT | CGAG - - - C | GTCATTTG - - - TA - - - CC | C - TCAA - GC 319 |                |
| KX118422.1_Alternaria_brassicicola_strain_BHU-LMMT11 | TG - CCTGTT | CGAG - - - C | GTCATTTG - - - TA - - - CC | C - TCAA - GC 327 |                |
| KX179478.1_Alternaria_alternata_strain_BHU-LMMT35    | TG - CCTGTT | CGAG - - - C | GTCATTTG - - - TA - - - CC | C - TCAA - GC 320 |                |
| KX118416.1_Alternaria_alternata_strain_BHU-LMMT05    | TG - CCTGTT | CGAG - - - C | GTCATTTG - - - TA - - - CC | G - TCAA - GC 313 |                |
| KX179483.1_Alternaria_alternata_strain_BHU-LMMT40    | TG - CCTGTT | CGAG - - - C | GTCATTTG - - - TA - - - CC | C - TCAA - GC 329 |                |
| KX179484.1_Alternaria_alternata_strain_BHU-LMMT41    | TG - CCTGTT | CGAG - - - C | GTCATTTG - - - TA - - - CC | C - TCAA - GC 329 |                |
| KX179485.1_Alternaria_alternata_strain_BHU-LMMT42    | TG - CCTGTT | CGAG - - - C | GTCATTTG - - - TA - - - CC | C - TCAA - GC 332 |                |
| KX179482.1_Alternaria_solani_strain_BHU-LMMT39       | TG - CCTGTT | CGAG - - - C | GTCATTTG - - - TA - - - CC | G - TCAA - GC 327 |                |
| KX139158.1_Alternaria_tenuissima_strain_BHU-LMMT25   | TG - CCTGTT | CGAG - - - C | GTCATTTG - - - TA - - - CC | C - TCAA - GC 336 |                |
| JQ070079.1                                           | TG - CCTGTT | CGAG - - - C | GTCATTTG - - - TA - - - CC | C - TCAA - GC 357 |                |
| KX179480.1_Alternaria_alternata_strain_BHU-LMMT37    | TG - CCTGTT | CGAG - - - C | GTCATTTG - - - TA - - - CC | C - TCAA - GC 355 |                |
| KX179479.1_Alternaria_alternata_strain_BHU-LMMT36    | TG - CCTGTT | CGAG - - - C | GTCATTTG - - - TA - - - CC | G - TCAA - GC 349 |                |
| KX139153.1_Alternaria_brassicicola_strain_BHU-LMMT20 | TG - CCTGTT | CGAG - - - C | GTCATTTG - - - TA - - - CC | C - TCAA - GC 372 |                |
| KX179489.1_Alternaria_alternata_strain_BHU-LMMT46    | TG - CCTGTT | CGAG - - - C | GTCATTTG - - - TA - - - CC | C - TCAA - GC 368 |                |
| KX139163.1_Alternaria_eichhorniae_strain_BHU-LMMT30  | TG - CCTGTT | CGAG - - - C | GTCATTTG - - - TA - - - CC | C - TCAA - GC 344 |                |
| KX179488.1_Alternaria_alternata_strain_BHU-LMMT45    | TG - CCTGTT | CGAG - - - C | GTCATTTG - - - TA - - - CC | G - TCAA - GC 342 |                |
| KX179481.1_Alternaria_solani_strain_BHU-LMMT38       | TG - CCTGTT | CGAG - - - C | GTCATTTG - - - TA - - - CC | C - TCAA - GC 342 |                |
| KX179487.1_Alternaria_sp._2_MM-2016                  | TG - CCTGTT | CGAG - - - C | GTCATTTG - - - TA - - - CC | C - TCAA - GC 352 |                |
| KX139164.1_Alternaria_eichhorniae_strain_BHU-LMMT31  | TG - CCTGTT | CGAG - - - C | GTCATTTG - - - TA - - - CC | C - TCAA - GC 345 |                |
| KX179490.1_Alternaria_sp._3_MM-2016                  | TG - CCTGTT | CGAG - - - C | GTCATTTG - - - TA - - - CC | G - TCAA - GC 382 |                |
| KX179477.1_Alternaria_alternata_strain_BHU-LMMT34    | TG - CCTGTT | CGAG - - - C | GTCATTTG - - - TA - - - CC | C - TCAAAGC 357   |                |
| KX179486.1_Alternaria_sp._1_MM-2016                  | TG - CCTGTT | CGAG - - - C | GTCATTTG - - - TA - - - CC | C - TCAA - GC 352 |                |
| KX179491.1_Alternaria_sp._4_MM-2016                  | TG - CCTGTT | CGAG - - - C | GTCATTTG - - - TA - - - CC | C - TCAA - GC 389 |                |
| KX139154.1_Alternaria_brassicicola_strain_BHU-LMMT21 | TG - CCTGTT | CGAG - - - C | GTCATTTG - - - TA - - - CC | G - TCAA - GC 396 |                |
| KX139152.1_Alternaria_brassicicola_strain_BHU-LMMT19 | TG - CCTGTT | CGAG - - - C | GTCATTTG - - - TA - - - CC | C - TCAA - GC 316 |                |
| KX139165.1_Alternaria_macrospora_strain_BHU-LMMT32   | TG - CCTGTT | CGAG - - - C | GTCATTTG - - - TA - - - CC | C - TCAA - GC 349 |                |
| KX139166.1_Alternaria_macrospora_strain_BHU-LMMT33   | TG - CCTGTT | CGAG - - - C | GTCATTTG - - - TA - - - CC | C - TCAA - GC 352 |                |
| KX139150.1_Alternaria_solani_strain_BHU-LMMT17       | TG - CCTGTT | CGAG - - - C | GTCATTTG - - - TA - - - CC | G - TCAA - GC 329 |                |
| KX139151.1_Alternaria_solani_strain_BHU-LMMT18       | TG - CCTGTT | CGAG - - - C | GTCATTTG - - - TA - - - CC | C - TCAA - GC 412 |                |
| KX139162.1_Alternaria_porri_strain_BHU-LMMT29        | TG - CCTGTT | CGAG - - - C | GTCATTTG - - - TA - - - CC | C - TCAA - GC 404 |                |
| KX139159.1_Alternaria_brassicicola_strain_BHU-LMMT26 | TG - CCTGTT | CGAG - - - C | GTCATTTG - - - TA - - - CC | C - TCAA - GC 356 |                |
| KX139160.1_Alternaria_brassicicola_strain_BHU-LMMT27 | TG - CCTGTT | CGAG - - - C | GTCATTTG - - - TA - - - CC | G - TCAA - GC 362 |                |
| KX139157.1_Alternaria_tenuissima_strain_BHU-LMMT24   | TG - CCTGTT | CAAG - - - C | GTCATTTG - - - TA - - - CC | C - TCAA - GA 341 |                |
| KX139161.1_Alternaria_porri_strain_BHU-LMMT28        | TG - CCTGTT | CGAG - - - C | GTCATTTG - - - TA - - - CC | T - TCAA - GC 348 |                |
| KX139155.1_Alternaria_brassicicola_strain_BHU-LMMT22 | GAA TCCCGTA | CGTGGTCGCT   | GGCTATTGCC                 | G TGTAAAGCC       | CCTTCGACGA 355 |
| KX139156.1_Alternaria_brassicicola_strain_BHU-LMMT23 | GAA TCCCGTA | CGTGGTCGCT   | GGCTATTGCC                 | G TGTAAAGCC       | CCTTCGACGA 229 |
| Consensus                                            | TG - CCTGTT | CGAG - - - C | GTCATTTG - - - TA - - - CC | C - TCAA - GC     |                |
| Conservation                                         |             |              |                            |                   |                |

KX118413.1\_Alternaria\_alternata\_strain\_BHU-LMMT02 TTTGCTTGGT --GTT--GG GCGTCTT --GTCCTAGCT TT-GCTGG-A 359  
 KX118415.1\_Alternaria\_alternata\_strain\_BHU-LMMT04 TTTGCTTGGT --GTT--GG GCGTCTT --GTCCTAGCT TT-GCTGG-A 362  
 KX118418.1\_Alternaria\_alternata\_strain\_BHU-LMMT07 TTTGCTTGGT --GTT--GG GCGTCTT --GTCCTAGCT TT-GCTGG-A 360  
 KX118419.1\_Alternaria\_alternata\_strain\_BHU-LMMT08 TTTGCTTGGT --GTT--GG GCGTCTT --GTCCTAGCT TT-GCTGG-A 360  
 KX118421.1\_Alternaria\_brassicicola\_strain\_BHU-LMMT10 TTTGCTTGGT --GTT--GG GCGTCTT --GTCCTAGCT TT-GCTGG-A 359  
 KX118425.1\_Alternaria\_brassicicola\_strain\_BHU-LMMT14 TTTGCTTGGT --GTT--GG GCGTCTT --GTCCTAGCT TT-GCTGG-A 360  
 KX118426.1\_Alternaria\_brassicicola\_strain\_BHU-LMMT15 TTTGCTTGGT --GTT--GG GCGTCTT --GTCCTAGCT TT-GCTGG-A 359  
 KX118427.1\_Alternaria\_solani\_strain\_BHU-LMMT16 TTTGCTTGGT --GTT--GG GCGTCTT --GTCCTAGCT TT-GCTGG-A 360  
 KX118424.1\_Alternaria\_brassicicola\_strain\_BHU-LMMT13 TTTGCTTGGT --GTT--GG GCGTCTT --GTCCTAGCT TT-GCTGG-A 360  
 KX118414.1\_Alternaria\_alternata\_strain\_BHU-LMMT03 TTTGCTTGGT --GTT--GG GCGTCTT --GTCCTAGCT TT-GCTGG-A 361  
 KX118423.1\_Alternaria\_brassicicola\_strain\_BHU-LMMT12 TTTGCTTGGT --GTT--GG GCGTCTT --GTCCTAGCT TT-GCTGG-A 361  
 KX118412.1\_Alternaria\_alternata\_strain\_BHU-LMMT01 TTTGCTTGGT --GTT--GG GCGTCTT --GTCCTAGCT TT-GCTGG-A 357  
 KX118417.1\_Alternaria\_alternata\_strain\_BHU-LMMT06 TTTGCTTGGT --GTT--GG GCGTCTT --GTCCTAGCT TT-GCTGG-A 359  
 KX118420.1\_Alternaria\_alternata\_strain\_BHU-LMMT09 TTTGCTTGGT --GTT--GG GCGTCTT --GTCCTAGCT TT-GCTGG-A 359  
 KX118422.1\_Alternaria\_brassicicola\_strain\_BHU-LMMT11 TTTGCTTGGT --GTT--GG GCGTCTT --GTCCTAGCT TT-GCTGG-A 367  
 KX179478.1\_Alternaria\_alternata\_strain\_BHU-LMMT35 TTTGCTTGGT --GTT--GG GCGTCTT --GTCCTAGCT TT-GCTGG-A 360  
 KX118416.1\_Alternaria\_alternata\_strain\_BHU-LMMT05 TTTGCTTGGT --GTT--GG GCGTCTT --GTCCTAGCT TT-GCTGG-A 353  
 KX179483.1\_Alternaria\_alternata\_strain\_BHU-LMMT40 TTTGCTTGGT --GTT--GG GCGTCTT --GTCCTAGCT TT-GCTGG-A 369  
 KX179484.1\_Alternaria\_alternata\_strain\_BHU-LMMT41 TTTGCTTGGT --GTT--GG GCGTCTT --GTCCTAGCT TT-GCTGG-A 369  
 KX179485.1\_Alternaria\_alternata\_strain\_BHU-LMMT42 TTTGCTTGGT --GTT--GG GCGTCTT --GTCCTAGCT TT-GCTGG-A 372  
 KX179482.1\_Alternaria\_solani\_strain\_BHU-LMMT39 TTTGCTTGGT --GTT--GG GCGTCTT --GTCCTAGCT TT-GCTGG-A 367  
 KX139158.1\_Alternaria\_tenuissima\_strain\_BHU-LMMT25 TTTGCTTGGT --GTT--GG GCGTCTT --GTCCTAGCT TT-GCTGG-A 376  
 JQ070079.1 TTTGCTTGGT --GTT--GG GCGTCTT --GTCCTAGCT TT-GCTGG-A 397  
 KX179480.1\_Alternaria\_alternata\_strain\_BHU-LMMT37 TTTGCTTGGT --GTT--GG GCGTCTT --GTCCTAGCT TT-GCTGG-A 395  
 KX179479.1\_Alternaria\_alternata\_strain\_BHU-LMMT36 TTTGCTTGGT --GTT--GG GCGTCTT --GTCCTAGCT TT-GCTGG-A 389  
 KX139153.1\_Alternaria\_brassicicola\_strain\_BHU-LMMT20 TTTGCTTGGT --GTT--GG GCGTCTT --GTCCTAGCT TT-GCTGG-A 412  
 KX179489.1\_Alternaria\_alternata\_strain\_BHU-LMMT46 TTTGCTTGGT --GTT--GG GCGTCTT --GTCCTAGCT TT-GCTGG-A 408  
 KX139163.1\_Alternaria\_eichhorniae\_strain\_BHU-LMMT30 TTTGCTTGGT TTGTT--GG GCGTCTT --GTCCTAGCT TT-GCTGG-A 386  
 KX179488.1\_Alternaria\_alternata\_strain\_BHU-LMMT45 TTTGCTTGGT --GTT--GG GCGTCTT --GTCCTAGCT TT-GCTGG-A 382  
 KX179481.1\_Alternaria\_solani\_strain\_BHU-LMMT38 TTTGCTTGGT --GTT--GG GCGTCTT --GTCCTAGCT TT-GCTGG-A 382  
 KX179487.1\_Alternaria\_sp.\_2\_MM-2016 TTTGCTTGGT --GTT--GG GCGTCTT --GTCCTAGCT TT-GCTGG-A 392  
 KX139164.1\_Alternaria\_eichhorniae\_strain\_BHU-LMMT31 TTTGCTTGGT --GTT--GG GCGTCTT --GTCCTAGCT TT-GCTGG-A 385  
 KX179490.1\_Alternaria\_sp.\_3\_MM-2016 TTTGCTTGGT --GTT--GG GCGTCTT --GTCCTAGCT TT-GCTGG-A 422  
 KX179477.1\_Alternaria\_alternata\_strain\_BHU-LMMT34 TTTGCTTGGT --GTT--GG GCGTCTT --GTCCTAGCT TT-GCTGG-A 397  
 KX179486.1\_Alternaria\_sp.\_1\_MM-2016 TTTGCTTGGT --GTT--GG GCGTCTT --GTCCTAGCT TT-GCTGG-A 392  
 KX179491.1\_Alternaria\_sp.\_4\_MM-2016 TTTGCTTGGT --GTT--GG GCGTCTT --GTCCTAGCT TT-GCTGG-A 429  
 KX139154.1\_Alternaria\_brassicicola\_strain\_BHU-LMMT21 TTTGCTTGGT --GTT--GG GCGTCTT --GTCCTAGCT TTTGCTGG-A 437  
 KX139152.1\_Alternaria\_brassicicola\_strain\_BHU-LMMT19 TTTGCTTGGT --GTT--GG GCGTCTT --GTCCTAGCT TT-GCTGG-A 355  
 KX139165.1\_Alternaria\_macrospora\_strain\_BHU-LMMT32 TTTGCTTGGT --GTT--GG GCGTCTT --GTCCTAGCT TT-GCGGGGA 388  
 KX139166.1\_Alternaria\_macrospora\_strain\_BHU-LMMT33 TTTGCTTGGT --GTT--GG GCGTCTT TTTT GTCACCCCTT -GCGGGGA 396  
 KX139150.1\_Alternaria\_solani\_strain\_BHU-LMMT17 TTTGCTTGGT --GTT--GG GCGTCTT TTTT GTCT--CTCC TT-CGGGG 370  
 KX139151.1\_Alternaria\_solani\_strain\_BHU-LMMT18 TTTGCTTGGT --GTTGGGG GCGTCTT TTTT GTCT--CC CTTGC-GGGA 456  
 KX139162.1\_Alternaria\_porri\_strain\_BHU-LMMT29 TTTGCTTGGT --GTT--GG --GTCTTTT GTCTC--CC CTTGC-GGGA 441  
 KX139159.1\_Alternaria\_brassicicola\_strain\_BHU-LMMT26 TTTGCTTGGT --GTT--GG GCGTCTT --GTCCTAGCT --TTTGTGG-A 395  
 KX139160.1\_Alternaria\_brassicicola\_strain\_BHU-LMMT27 TTTGCTTGGT --GTT--GG GCGTCTT --GTCCTAGCT --TTTGTGG-A 401  
 KX139157.1\_Alternaria\_tenuissima\_strain\_BHU-LMMT24 TTTGCTTGGT --GTT--GG GCGTCTT --GTCCTACT TTTG--GGGA 381  
 KX139161.1\_Alternaria\_porri\_strain\_BHU-LMMT28 TTTGCTTGGT --GTT--GG GTGTTT--GTCCT--GCC TCTGGCGCA 387  
 KX139155.1\_Alternaria\_brassicicola\_strain\_BHU-LMMT22 GTCGAGT-- --TGTTT--GG GAAT----- -GC--AGCT CTAATGGGA 389  
 KX139156.1\_Alternaria\_brassicicola\_strain\_BHU-LMMT23 GTCGAGT-- --TGTTT--GG GAAT----- -GC--AGCT CTAATGGGA 263

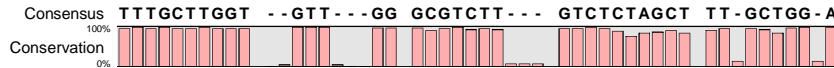

|                                                      | 560        | 580        | 600        |                       |
|------------------------------------------------------|------------|------------|------------|-----------------------|
| KX118413.1_Alternaria_alternata_strain_BHU-LMMT02    | GACTCG     | CTT-AAAG   | TAATTGGC   | AGCCGGC CTACT         |
| KX118415.1_Alternaria_alternata_strain_BHU-LMMT04    | GACTCG     | CTT-AAAG   | TAATTGGC   | AGCCGGC CTACT         |
| KX118418.1_Alternaria_alternata_strain_BHU-LMMT07    | GACTCG     | CTT-AAAG   | TAATTGGC   | AGCCGGC CTACT         |
| KX118419.1_Alternaria_alternata_strain_BHU-LMMT08    | GACTCG     | CTT-AAAG   | TAATTGGC   | AGCCGGC CTACT         |
| KX118421.1_Alternaria_brassicicola_strain_BHU-LMMT10 | GACTCG     | CTT-AAAG   | TAATTGGC   | AGCCGGC CTACT         |
| KX118425.1_Alternaria_brassicicola_strain_BHU-LMMT14 | GACTCG     | CTT-AAAG   | TAATTGGC   | AGCCGGC CTACT         |
| KX118426.1_Alternaria_brassicicola_strain_BHU-LMMT15 | GACTCG     | CTT-AAAG   | TAATTGGC   | AGCCGGC CTACT         |
| KX118427.1_Alternaria_solani_strain_BHU-LMMT16       | GACTCG     | CTT-AAAG   | TAATTGGC   | AGCCGGC CTACT         |
| KX118424.1_Alternaria_brassicicola_strain_BHU-LMMT13 | GACTCG     | CTT-AAAG   | TAATTGGC   | AGCCGGC CTACT         |
| KX118414.1_Alternaria_alternata_strain_BHU-LMMT03    | GACTCG     | CTT-AAAG   | TAATTGGC   | AGCCGGC CTACT         |
| KX118423.1_Alternaria_brassicicola_strain_BHU-LMMT12 | GACTCG     | CTT-AAAG   | TAATTGGC   | AGCCGGC CTACT         |
| KX118412.1_Alternaria_alternata_strain_BHU-LMMT01    | GACTCG     | CTT-AAAG   | TAATTGGC   | AGCCGGC CTACT         |
| KX118417.1_Alternaria_alternata_strain_BHU-LMMT06    | GACTCG     | CTT-AAAG   | TAATTGGC   | AGCCGGC CTACT         |
| KX118420.1_Alternaria_alternata_strain_BHU-LMMT09    | GACTCG     | CTT-AAAG   | TAATTGGC   | AGCCGGC CTACT         |
| KX118422.1_Alternaria_brassicicola_strain_BHU-LMMT11 | GACTCG     | CTT-AAAG   | TAATTGGC   | AGCCGGC CTACT         |
| KX179478.1_Alternaria_alternata_strain_BHU-LMMT35    | GACTCG     | CTT-AAAG   | TAATTGGC   | AGCCGGC CTACT         |
| KX118416.1_Alternaria_alternata_strain_BHU-LMMT05    | GACTCG     | CTT-AAAG   | TAATTGGC   | AGCCGGC CTACT         |
| KX179483.1_Alternaria_alternata_strain_BHU-LMMT40    | GACTCG     | CTT-AAAG   | TAATTGGC   | AGCCGGC CTACT         |
| KX179484.1_Alternaria_alternata_strain_BHU-LMMT41    | GACTCG     | CTT-AAAG   | TAATTGGC   | AGCCGGC CTACT         |
| KX179485.1_Alternaria_alternata_strain_BHU-LMMT42    | GACTCG     | CTT-AAAG   | TAATTGGC   | AGCCGGC CTACT         |
| KX179482.1_Alternaria_solani_strain_BHU-LMMT39       | GACTCG     | CTT-AAAG   | TAATTGGC   | AGCCGGC CTACT         |
| KX139158.1_Alternaria_tenuissima_strain_BHU-LMMT25   | GACTCG     | CTT-AAAG   | TAATTGGC   | AGCCGGC CTACT         |
| JQ070079.1                                           | GACTCG     | CTT-AAAG   | TAATTGGC   | AGCCGGC CTACT         |
| KX179480.1_Alternaria_alternata_strain_BHU-LMMT37    | GACTCG     | CTT-AAAG   | TAATTGGC   | AGCCGGC CTACT         |
| KX179479.1_Alternaria_alternata_strain_BHU-LMMT36    | GACTCG     | CTT-AAAG   | TAATTGGC   | AGCCGGC CTACT         |
| KX139153.1_Alternaria_brassicicola_strain_BHU-LMMT20 | GACTCG     | CTT-AAAG   | TAATTGGC   | AGCCGGC CTACT         |
| KX179489.1_Alternaria_alternata_strain_BHU-LMMT46    | GACTCG     | CTT-AAAG   | TAATTGGC   | AGCCGGC CTACT         |
| KX139163.1_Alternaria_eichhorniae_strain_BHU-LMMT30  | GACTCG     | CTT-AAAG   | TAATTGGC   | AGCCGGC CTACT         |
| KX179488.1_Alternaria_alternata_strain_BHU-LMMT45    | GACTCG     | CTT-AAAG   | TAATTGGC   | AGCCGGC CTACT         |
| KX179481.1_Alternaria_solani_strain_BHU-LMMT38       | GACTCG     | CTT-AAAG   | TAATTGGC   | AGCCGGC CTACT         |
| KX179487.1_Alternaria_sp._2_MM-2016                  | GACTCG     | CTT-AAAG   | TAATTGGC   | CAACT                 |
| KX139164.1_Alternaria_eichhorniae_strain_BHU-LMMT31  | GACTCG     | CTT-AAAG   | TAATTGGC   | AGCCGGC CTACT         |
| KX179490.1_Alternaria_sp._3_MM-2016                  | GACTCG     | CTT-AAAG   | TAATTGGC   | AGCCGGC CTACT         |
| KX179477.1_Alternaria_alternata_strain_BHU-LMMT34    | GACTCG     | CTT-AAAG   | TAATTGGC   | AGCCGGC CTACT         |
| KX179486.1_Alternaria_sp._1_MM-2016                  | GACTCG     | CTT-AAAG   | TAATTGGC   | AGCCGGC CTACT         |
| KX179491.1_Alternaria_sp._4_MM-2016                  | GACTCG     | CTT-AAAG   | TAATTGGC   | AGCCGGC CTACT         |
| KX139154.1_Alternaria_brassicicola_strain_BHU-LMMT21 | GACTCG     | CTT-AAAG   | TCATTGGC   | AGCCGGC CTACT         |
| KX139152.1_Alternaria_brassicicola_strain_BHU-LMMT19 | GACTCG     | CTT-AAAG   | TCATTGGC   | AGCCGGC CTACT         |
| KX139165.1_Alternaria_macrospora_strain_BHU-LMMT32   | GACTCG     | CTT-AAAG   | TCATTGGC   | AGCCGGC CTACTGCGCT    |
| KX139166.1_Alternaria_macrospora_strain_BHU-LMMT33   | GACTCG     | CTT-AAAG   | TCATTGGC   | AGCCGGC CTACT         |
| KX139150.1_Alternaria_solani_strain_BHU-LMMT17       | GACTCG     | CTT-AAAG   | TCATTGGC   | AGCCGGC CTACT         |
| KX139151.1_Alternaria_solani_strain_BHU-LMMT18       | GACTCG     | CTT-AAAG   | TCATTGGC   | AGCCGGC CTACT         |
| KX139162.1_Alternaria_porri_strain_BHU-LMMT29        | GACTCG     | CTT-AAAG   | TCATTGGC   | AGCCGGC CTACT         |
| KX139159.1_Alternaria_brassicicola_strain_BHU-LMMT26 | GACTCG     | CTT-AAAG   | TCATTGGC   | AGCCGGC CTACT         |
| KX139160.1_Alternaria_brassicicola_strain_BHU-LMMT27 | GACTCG     | CTT-AAAG   | TCATTGGC   | AGCCGGC CTACT         |
| KX139157.1_Alternaria_tenuissima_strain_BHU-LMMT24   | AACCCA     | CTT-AGAA   | AAATTGGC   | AACCCGGC CTAAT        |
| KX139161.1_Alternaria_porri_strain_BHU-LMMT28        | GACTCG     | CTT-AAAA   | CAATTGGC   | AGCCGGC GTATT         |
| KX139155.1_Alternaria_brassicicola_strain_BHU-LMMT22 | GGTACATTTT | TTCTAAAGCT | AAATATTGGC | CAGAGACCGA TAGCGCACAA |
| KX139156.1_Alternaria_brassicicola_strain_BHU-LMMT23 | GGTACATTTT | TTCTAAAGCT | AAATATTGGC | CAGAGACCGA TAGCGCACAA |
| Consensus                                            | GACTCG     | CTT-AAAG   | TAATTGGC   | AGCCGGC CTACT         |

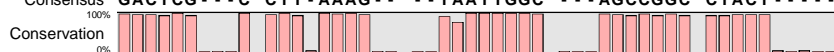

KX118413.1\_Alternaria\_alternata\_strain\_BHU-LMMT02 - - - - GGTTT CG -- GAG - C GCAGCACAA - GTC - - GCAC T CT - CTATCAG 430  
 KX118415.1\_Alternaria\_alternata\_strain\_BHU-LMMT04 - - - - GGTTT CG -- GAG - C GCAGCACAA - GTC - - GCAC T CT - CTATCAG 433  
 KX118418.1\_Alternaria\_alternata\_strain\_BHU-LMMT07 - - - - GGTTT CG -- GAG - C GCAGCACAA - GTC - - GCAC T CT - CTATCAG 431  
 KX118419.1\_Alternaria\_alternata\_strain\_BHU-LMMT08 - - - - GGTTT CG -- GAG - C GCAGCACAA - GTC - - GCAC T CT - CTATCAG 431  
 KX118421.1\_Alternaria\_brassicicola\_strain\_BHU-LMMT10 - - - - GGTTT CG -- GAG - C GCAGCACAA - GTC - - GCAC T CT - CTATCAG 430  
 KX118425.1\_Alternaria\_brassicicola\_strain\_BHU-LMMT14 - - - - GGTTT CG -- GAG - C GCAGCACAA - GTC - - GCAC T CT - CTATCAG 431  
 KX118426.1\_Alternaria\_brassicicola\_strain\_BHU-LMMT15 - - - - GGTTT CG -- GAG - C GCAGCACAA - GTC - - GCAC T CT - CTATCAG 430  
 KX118427.1\_Alternaria\_solani\_strain\_BHU-LMMT16 - - - - GGTTT CG -- GAG - C GCAGCACAA - GTC - - GCAC T CT - CTATCAG 431  
 KX118424.1\_Alternaria\_brassicicola\_strain\_BHU-LMMT13 - - - - GGTTT CG -- GAG - C GCAGCACAA - GTC - - GCAC T CT - CTATCAG 431  
 KX118414.1\_Alternaria\_alternata\_strain\_BHU-LMMT03 - - - - GGTTT CG -- GAG - C GCAGCACAA - GTC - - GCAC T CT - CTATCAG 432  
 KX118423.1\_Alternaria\_brassicicola\_strain\_BHU-LMMT12 - - - - GGTTT CG -- GAG - C GCAGCACAA - GTC - - GCAC T CT - CTATCAG 432  
 KX118412.1\_Alternaria\_alternata\_strain\_BHU-LMMT01 - - - - GGTTT CG -- GAG - C GCAGCACAA - GTC - - GCAC T CT - CTATCAG 428  
 KX118417.1\_Alternaria\_alternata\_strain\_BHU-LMMT06 - - - - GGTTT CG -- GAG - C GCAGCACAA - GTC - - GCAC T CT - CTATCAG 430  
 KX118420.1\_Alternaria\_alternata\_strain\_BHU-LMMT09 - - - - GGTTT CG -- GAG - C GCAGCACAA - GTC - - GCAC T CT - CTATCAG 430  
 KX118422.1\_Alternaria\_brassicicola\_strain\_BHU-LMMT11 - - - - GGTTT CG -- GAG - C GCAGCACAA - GTC - - GCAC T CT - CTATCAG 438  
 KX179478.1\_Alternaria\_alternata\_strain\_BHU-LMMT35 - - - - GGTTT CG -- GAG - C GCAGCACAA - GTC - - GCAC T CT - CTATCAG 431  
 KX118416.1\_Alternaria\_alternata\_strain\_BHU-LMMT05 - - - - GGTTT CG -- GAG - C GCAGCACAA - GTC - - GCAC T CT - CTATCAG 424  
 KX179483.1\_Alternaria\_alternata\_strain\_BHU-LMMT40 - - - - GGTTT CG -- GAG - C GCAGCACAA - GTC - - GCAC T CT - CTATCAG 440  
 KX179484.1\_Alternaria\_alternata\_strain\_BHU-LMMT41 - - - - GGTTT CG -- GAG - C GCAGCACAA - GTC - - GCAC T CT - CTATCAG 440  
 KX179485.1\_Alternaria\_alternata\_strain\_BHU-LMMT42 - - - - GGTTT CG -- GAG - C GCAGCACAA - GTC - - GCAC T CT - CTATCAG 443  
 KX179482.1\_Alternaria\_solani\_strain\_BHU-LMMT39 - - - - GGTTT CG -- GAG - C GCAGCACAA - GTCGCAC T CT - CTATCAG 440  
 KX139158.1\_Alternaria\_tenuissima\_strain\_BHU-LMMT25 - - - - GGTTT CG -- GAG - C GCAGCACAA - GTC - - GCAC T CT - CTATCAG 447  
 JQ070079.1 - - - - GGTTT CG -- GAG - C GCAGCACAA - GTC - - GCAC T CT - CTATCAG 468  
 KX179480.1\_Alternaria\_alternata\_strain\_BHU-LMMT37 - - - - GGTTT CG -- GAG - C GCAGCACAA - GTC - - GCAC T CT - CTATCAG 466  
 KX179479.1\_Alternaria\_alternata\_strain\_BHU-LMMT36 - - - - GGTTT CG -- GAG - C GCAGCACAA - GTC - - GCAC T CT - CTATCAG 460  
 KX139153.1\_Alternaria\_brassicicola\_strain\_BHU-LMMT20 - - - - GGTTT CG -- GAG - C GCAGCACAA - GTC - - GCAC T CT - CTATCAG 483  
 KX179489.1\_Alternaria\_alternata\_strain\_BHU-LMMT46 - - - - GGTTT CG -- GAG - C GCAGCACAA - GTC - - GCAC T CT - CTATCAG 479  
 KX139163.1\_Alternaria\_eichhorniae\_strain\_BHU-LMMT30 - - - - GGTTT CG -- GAG - C GCAGCACAA - GTC - - GCAC T CT - CTATCAG 457  
 KX179488.1\_Alternaria\_alternata\_strain\_BHU-LMMT45 - - - - GGTTT CG -- GAG - C GCAGCACAA - GTC - - GCAC T CT - CTATCAG 453  
 KX179481.1\_Alternaria\_solani\_strain\_BHU-LMMT38 - - - - GGTTT CG -- GAG - C GCAGCACAA - GTC - - GCAC T CT - CTATCAG 453  
 KX179487.1\_Alternaria\_sp.\_2\_MM-2016 - - - - GGTTT CG -- GAG - C GCAGCACAA - GTC - - GCAC T CT - CTATCAG 455  
 KX139164.1\_Alternaria\_eichhorniae\_strain\_BHU-LMMT31 - - - - GGTTT CG -- GAG - C GCAGCACAA - GTC - - GCAC T CT - CTATCAG 456  
 KX179490.1\_Alternaria\_sp.\_3\_MM-2016 - - - - GGTTT CG -- GAG - C GCAGCACAA - GTC - - GCAC T CT - CTATCAG 493  
 KX179477.1\_Alternaria\_alternata\_strain\_BHU-LMMT34 - - - - GGTTT CG -- GAG - C GCAGCACAA - GTC - - GCAC T CT - CTATCAG 468  
 KX179486.1\_Alternaria\_sp.\_1\_MM-2016 - - - - GGTTT CG -- GAG - C GCAGCACAA - GTC - - GCAC T CT - CTATCAG 463  
 KX179491.1\_Alternaria\_sp.\_4\_MM-2016 - - - - GGTTT CG -- GAG - C GCAGCACAA - GTC - - GCAC T CT - CTATCAG 500  
 KX139154.1\_Alternaria\_brassicicola\_strain\_BHU-LMMT21 - - - - GGTTT CG -- GAG - C GCAGCACAA - GTC - - GCGCT CT - CT - - - - 503  
 KX139152.1\_Alternaria\_brassicicola\_strain\_BHU-LMMT19 - - - - GGTTT CG -- GAG - C GCAGCACAA - GTCGCGCTCT CT - TAAACCAG 428  
 KX139165.1\_Alternaria\_macrospora\_strain\_BHU-LMMT32 - - - - TTTCTGGTTT CG -- GAG - C GCAGCACAA - GTC - - GCGCT CT - CTTCCAG 469  
 KX139166.1\_Alternaria\_macrospora\_strain\_BHU-LMMT33 - - - - GGTTT CG -- GAG - C GCAGCACAA - GTC - - GCGCT CT - CTTCCAG 467  
 KX139150.1\_Alternaria\_solani\_strain\_BHU-LMMT17 - - - - GGTTT CG -- GAG - C GCAGCACAA - GTC - - GCGCT CT - CTTCCAG 441  
 KX139151.1\_Alternaria\_solani\_strain\_BHU-LMMT18 - - - - GGTTT CG -- GAG - C G - - - - - - - - - - - - - - - - - - - - 503  
 KX139162.1\_Alternaria\_porri\_strain\_BHU-LMMT29 - - - - GGTTT CG -- GAG - C GCAGCACAA - GTCGCGCT - - - - - - - - - - - - - - - - 503  
 KX139159.1\_Alternaria\_brassicicola\_strain\_BHU-LMMT26 - - - - GGTTT CG -- GAG - C GCAGCACAA - GTC - - GCGCT CT - CTTCCAG 466  
 KX139160.1\_Alternaria\_brassicicola\_strain\_BHU-LMMT27 - - - - GGTTT CG -- GAG - C GCAGCACAA - GTC - - GCGCT CT - CTTCCAG 472  
 KX139157.1\_Alternaria\_tenuissima\_strain\_BHU-LMMT24 - - - - GGTTG CG -- AAATC GCACCACAA - GGCTGACACT C - - CAA - CAG 453  
 KX139161.1\_Alternaria\_porri\_strain\_BHU-LMMT28 - - - - GATTTT CG -- GAG - C GCAGTACA - - - TCTGCGCT TTGCACTCA - 459  
 KX139155.1\_Alternaria\_brassicicola\_strain\_BHU-LMMT22 - GTAGAGTGAT CGAAAGATGA AAAGCACTTT GAAAAGAGAG - - TCAAACAG 487  
 KX139156.1\_Alternaria\_brassicicola\_strain\_BHU-LMMT23 - GTAGAGTGAT CGAAAGATGA AAAGCACTTT GAAAAGAGAG GGTCAAACAG 363  
 Consensus - - - - GGTTT CG -- GAG - C GCAGCACAA - GTC - - GCAC T CT - CTATCAG

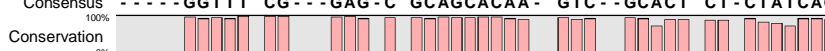

|                                                      | 660           | 680           | 700         |               |              |         |
|------------------------------------------------------|---------------|---------------|-------------|---------------|--------------|---------|
| KX118413.1_Alternaria_alternata_strain_BHU-LMMT02    | CA - - AAGGTC | TAGCATCCA -   | TTAAGCCTTT  | TTTT - CAACT  | TTTGACCTCG   | 476     |
| KX118415.1_Alternaria_alternata_strain_BHU-LMMT04    | CA - - AAGGTC | TAGCATCCA -   | TTAAGCCTTT  | TTTT - CAACT  | TTTGACCTCG   | 479     |
| KX118418.1_Alternaria_alternata_strain_BHU-LMMT07    | CA - - AAGGTC | TAGCATCCA -   | TTAAGCCTTT  | TTTT - CAACT  | TTTGACCTCG   | 477     |
| KX118419.1_Alternaria_alternata_strain_BHU-LMMT08    | CA - - AAGGTC | TAGCATCCA -   | TTAAGCCTTT  | TTTT - CAACT  | TTTGACCTCG   | 477     |
| KX118421.1_Alternaria_brassicicola_strain_BHU-LMMT10 | CA - - AAGGTC | TAGCATCCA -   | TTAAGCCTTT  | TTTT - CAACT  | TTTGACCTCG   | 476     |
| KX118425.1_Alternaria_brassicicola_strain_BHU-LMMT14 | CA - - AAGGTC | TAGCATCCA -   | TTAAGCCTTT  | TTTT - CAACT  | TTTGACCTCG   | 477     |
| KX118426.1_Alternaria_brassicicola_strain_BHU-LMMT15 | CA - - AAGGTC | TAGCATCCA -   | TTAAGCCTTT  | TTTT - CAACT  | TTTGACCTCG   | 476     |
| KX118427.1_Alternaria_solani_strain_BHU-LMMT16       | CA - - AAGGTC | TAGCATCCA -   | TTAAGCCTTT  | TTTT - CAACT  | TTTGACCTCG   | 477     |
| KX118424.1_Alternaria_brassicicola_strain_BHU-LMMT13 | CA - - AAGGTC | TAGCATCCA -   | TTAAGCCTTT  | TTTT - CAACT  | TTTGACCTCG   | 477     |
| KX118414.1_Alternaria_alternata_strain_BHU-LMMT03    | CA - - AAGGTC | TAGCATCCA -   | TTAAGCCTTT  | TTTT - CAACT  | TTTGACCTCG   | 478     |
| KX118423.1_Alternaria_brassicicola_strain_BHU-LMMT12 | CA - - AAGGTC | TAGCATCCA -   | TTAAGCCTTT  | TTTT - CAACT  | TTTGACCTCG   | 478     |
| KX118412.1_Alternaria_alternata_strain_BHU-LMMT01    | CA - - AAGGTC | TAGCATCCA -   | TTAAGCCTTT  | TTTT - CAACT  | TTTGACCTCG   | 474     |
| KX118417.1_Alternaria_alternata_strain_BHU-LMMT06    | CA - - AAGGTC | TAGCATCCA -   | TTAAGCCTTT  | TTTT - CAACT  | TTTGACCTCG   | 476     |
| KX118420.1_Alternaria_alternata_strain_BHU-LMMT09    | CA - - AAGGTC | TAGCATCCA -   | TTAAGCCTTT  | TTTT - CAACT  | TTTGACCTCG   | 476     |
| KX118422.1_Alternaria_brassicicola_strain_BHU-LMMT11 | CA - - AAGGTC | TAGCATCCA -   | TTAAGCCTTT  | TTTT - CAACT  | TTTGACCTCG   | 484     |
| KX179478.1_Alternaria_alternata_strain_BHU-LMMT35    | CA - - AAGGTC | TAGCATCCA -   | TTAAGCCTTT  | TTTT - CAACT  | TTTGACCTCG   | 477     |
| KX118416.1_Alternaria_alternata_strain_BHU-LMMT05    | CA - - AAGGTC | TAGCATCCA -   | TTAAGCCTTT  | TTTT - CAACT  | TTTGACCTCG   | 470     |
| KX179483.1_Alternaria_alternata_strain_BHU-LMMT40    | CA - - AAGGTC | TAGCATCCA -   | TTAAGCCTTT  | TTTT - CAACT  | TTTGACCTCG   | 486     |
| KX179484.1_Alternaria_alternata_strain_BHU-LMMT41    | CA - - AAGGTC | TAGCATCCA -   | TTAAGCCTTT  | TTTT - CAACT  | TTTGACCTCG   | 486     |
| KX179485.1_Alternaria_alternata_strain_BHU-LMMT42    | CA - - AAGGTC | TAGCATCCA -   | TTAAGCCTTT  | TTTT - CAACT  | TTTGACCTCG   | 489     |
| KX179482.1_Alternaria_solani_strain_BHU-LMMT39       | CA - - AAGGTC | TAGCATCCA -   | TTAAGCCTTT  | TTTT - CAACT  | TTTGACCTCG   | 486     |
| KX139158.1_Alternaria_tenuissima_strain_BHU-LMMT25   | CA - - AAGGTC | TAGCATCCA -   | TTAAGCCTTT  | TTTT - CAACT  | TTTGACCTCG   | 493     |
| JQ070079.1                                           | CA - - AAGGTC | TAGCATCCA -   | TTAAGCCTTT  | TTTT - CAAC   | -----        | 503     |
| KX179480.1_Alternaria_alternata_strain_BHU-LMMT37    | CA - - AAGGTC | TAGCATCCA -   | TTAAGCCTTT  | TTTT - CAACT  | T-----       | 503     |
| KX179479.1_Alternaria_alternata_strain_BHU-LMMT36    | CA - - AAGGTC | TAGCATCCA -   | TTAAGCCTTT  | TTTTCAACT     | TTTGAC       | --- 503 |
| KX139153.1_Alternaria_brassicicola_strain_BHU-LMMT20 | CA - - AAGGTC | TAGCATCCA -   | TTA-----    | -----         | -----        | 503     |
| KX179489.1_Alternaria_alternata_strain_BHU-LMMT46    | CA - - AAGGTC | TAGCATCCA -   | TTAAGCC--   | -----         | -----        | 503     |
| KX139163.1_Alternaria_eichhorniae_strain_BHU-LMMT30  | CA - - AAGGTC | TAGCATCCA -   | TTAAGCCTTT  | TTTT - CAACT  | TTTGACCTCG   | 502     |
| KX179488.1_Alternaria_alternata_strain_BHU-LMMT45    | CA - - AAGGTC | TAGCATCCA -   | TTAAGCCTTT  | TTTT - CAACT  | TTTGACCTCG   | 499     |
| KX179481.1_Alternaria_solani_strain_BHU-LMMT38       | CA - - AAGGTC | TAGCATCCA -   | TTAAGCCTTT  | TTTT - CAACT  | TTTGACCTCG   | 499     |
| KX179487.1_Alternaria_sp._2_MM-2016                  | CA - - AAGGTC | TAGCATCCA -   | TTAAGCCTTT  | TTTT - CAACT  | TTTGACCTCG   | 501     |
| KX139164.1_Alternaria_eichhorniae_strain_BHU-LMMT31  | CA - - AAGGTC | TAGCATCCA -   | TTAAGCCTTT  | TTTT - CAACT  | TTTGACCTCG   | 501     |
| KX179490.1_Alternaria_sp._3_MM-2016                  | CA - - AAGGTC | TA-----       | -----       | -----         | -----        | 503     |
| KX179477.1_Alternaria_alternata_strain_BHU-LMMT34    | CA - - AAGGTC | TAGCATCCA -   | TTAAGCCTTT  | TTTT - CAAC   | -----        | 503     |
| KX179486.1_Alternaria_sp._1_MM-2016                  | CA - - AAGGTC | TAGCATCCA -   | TTAAGCCTTT  | TTTTCAACT     | TTT-----     | 503     |
| KX179491.1_Alternaria_sp._4_MM-2016                  | CA - A-----   | -----         | -----       | -----         | -----        | 503     |
| KX139154.1_Alternaria_brassicicola_strain_BHU-LMMT21 | -----         | -----         | -----       | -----         | -----        | 503     |
| KX139152.1_Alternaria_brassicicola_strain_BHU-LMMT19 | CA - - AAGGTC | -AGTATCCAC    | AAAAGCCTTT  | TTTT - CAACT  | TTTGACCTCG   | 474     |
| KX139165.1_Alternaria_macrospora_strain_BHU-LMMT32   | CCCCAAGGTC    | TAGCATCCA -   | CCAAGCCTTT  | TTTT - C---   | -----        | 503     |
| KX139166.1_Alternaria_macrospora_strain_BHU-LMMT33   | CCCCAAGGTC    | TAGCATCCA -   | ACAAGCCTTT  | TTTT - CAA--  | -----        | 503     |
| KX139150.1_Alternaria_solani_strain_BHU-LMMT17       | CCCCAAGGTC    | TAGCATCCA -   | CCAAGCCTTT  | TTTTCAACT     | TTTGACCTCG   | 490     |
| KX139151.1_Alternaria_solani_strain_BHU-LMMT18       | -----         | -----         | -----       | -----         | -----        | 503     |
| KX139162.1_Alternaria_porri_strain_BHU-LMMT29        | -----         | -----         | -----       | -----         | -----        | 503     |
| KX139159.1_Alternaria_brassicicola_strain_BHU-LMMT26 | CC - - AAGGTC | -AGCATCCA -   | TAAAGCCTTT  | TTTT - CAACT  | TTT-----     | 503     |
| KX139160.1_Alternaria_brassicicola_strain_BHU-LMMT27 | CC - - AAGGTC | -AGCATCCA -   | TAAAGCCTTT  | TTTT - CA--   | -----        | 503     |
| KX139157.1_Alternaria_tenuissima_strain_BHU-LMMT24   | --GTAAGGTC    | TAGCATCCA -   | TAAATCCGTTT | TGATAC - - CT | TTTGACGTTT   | 499     |
| KX139161.1_Alternaria_porri_strain_BHU-LMMT28        | --TAACGAC     | GA - CATCCAA  | AAAGTACATT  | TTTTACACT     | TATGACCT--   | 503     |
| KX139155.1_Alternaria_brassicicola_strain_BHU-LMMT22 | CAC - GTGAAA  | TTGTTGA - - - | -----       | -----         | -----        | 503     |
| KX139156.1_Alternaria_brassicicola_strain_BHU-LMMT23 | CAC - GTGAAA  | TTGTTGAAAG    | GGAAGCGCTT  | GCAGCCAGAC    | TT - GCTTACA | 411     |
| Consensus                                            | CA - - AAGGTC | TAGCATCCA -   | TTAAGCCTTT  | TTTT - CAACT  | TTTGACCTCG   |         |

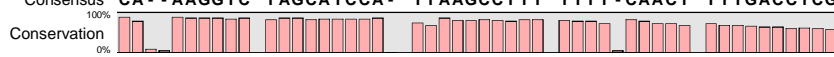

KX118413.1\_Alternaria\_alternata\_strain\_BHU-LMMT02 G-- -ATCAGG TAGGGATACC CGCTGAACTT 503  
 KX118415.1\_Alternaria\_alternata\_strain\_BHU-LMMT04 G-- -ATCAGG TAGGGATACC CGCTGAA 503  
 KX118418.1\_Alternaria\_alternata\_strain\_BHU-LMMT07 G-- -ATCAGG TAGGGATACC CGCTGAACT- 503  
 KX118419.1\_Alternaria\_alternata\_strain\_BHU-LMMT08 G-- -ATCAGG TAGGGATACC CGCTGAACT- 503  
 KX118421.1\_Alternaria\_brassicicola\_strain\_BHU-LMMT10 G-- -ATCAGG TAGGGATACC CGCTGAACTT 503  
 KX118425.1\_Alternaria\_brassicicola\_strain\_BHU-LMMT14 G-- -ATCAGG TAGGGATACC CGCTGAACT- 503  
 KX118426.1\_Alternaria\_brassicicola\_strain\_BHU-LMMT15 G-- -ATCAGG TAGGGATACC CGCTGAACTT 503  
 KX118427.1\_Alternaria\_solani\_strain\_BHU-LMMT16 G-- -ATCAGG TAGGGATACC CGCTGAACT- 503  
 KX118424.1\_Alternaria\_brassicicola\_strain\_BHU-LMMT13 G-- -ATCAGG TAGGGATACC CGCTGAACT- 503  
 KX118414.1\_Alternaria\_alternata\_strain\_BHU-LMMT03 G-- -ATCAGG TAGGGATACC CGCTGAACT- 503  
 KX118423.1\_Alternaria\_brassicicola\_strain\_BHU-LMMT12 G-- -ATCAGG TAGGGATACC CGCTGAACT- 503  
 KX118412.1\_Alternaria\_alternata\_strain\_BHU-LMMT01 G-- -ATCAGG TAGGGATACC CGCTGAACTT AA 503  
 KX118417.1\_Alternaria\_alternata\_strain\_BHU-LMMT06 G-- -ATCAGG TAGGGATACC CGCTGAACTT 503  
 KX118420.1\_Alternaria\_alternata\_strain\_BHU-LMMT09 G-- -ATCAGG TAGGGATACC CGCTGAACTT 503  
 KX118422.1\_Alternaria\_brassicicola\_strain\_BHU-LMMT11 G-- -ATCAGG TAGGGATACC CG 503  
 KX179478.1\_Alternaria\_alternata\_strain\_BHU-LMMT35 G-- -ATCAGG TAGGGATACC CGCTGAACT- 503  
 KX118416.1\_Alternaria\_alternata\_strain\_BHU-LMMT05 G-- -ATCAGG TAGGGATACC CGCTGAACTT AAGCAT 503  
 KX179483.1\_Alternaria\_alternata\_strain\_BHU-LMMT40 G-- -ATCAGG TAGGGATACC 503  
 KX179484.1\_Alternaria\_alternata\_strain\_BHU-LMMT41 G-- -ATCAGG TAGGGATACC 503  
 KX179485.1\_Alternaria\_alternata\_strain\_BHU-LMMT42 G-- -ATCAGG TAGGGAT 503  
 KX179482.1\_Alternaria\_solani\_strain\_BHU-LMMT39 G-- -ATCAGG TAGGGATACC 503  
 KX139158.1\_Alternaria\_tenuissima\_strain\_BHU-LMMT25 GGGGATCAGG 503  
 JQ070079.1 503  
 KX179480.1\_Alternaria\_alternata\_strain\_BHU-LMMT37 503  
 KX179479.1\_Alternaria\_alternata\_strain\_BHU-LMMT36 503  
 KX139153.1\_Alternaria\_brassicicola\_strain\_BHU-LMMT20 503  
 KX179489.1\_Alternaria\_alternata\_strain\_BHU-LMMT46 503  
 KX139163.1\_Alternaria\_eichhorniae\_strain\_BHU-LMMT30 G- - - - - 503  
 KX179488.1\_Alternaria\_alternata\_strain\_BHU-LMMT45 G-- -ATC- - - - - 503  
 KX179481.1\_Alternaria\_solani\_strain\_BHU-LMMT38 G-- -ATC- - - - - 503  
 KX179487.1\_Alternaria\_sp.\_2\_MM-2016 G-- -A - - - - - 503  
 KX139164.1\_Alternaria\_eichhorniae\_strain\_BHU-LMMT31 G-- -A - - - - - 503  
 KX179490.1\_Alternaria\_sp.\_3\_MM-2016 503  
 KX179477.1\_Alternaria\_alternata\_strain\_BHU-LMMT34 503  
 KX179486.1\_Alternaria\_sp.\_1\_MM-2016 503  
 KX179491.1\_Alternaria\_sp.\_4\_MM-2016 503  
 KX139154.1\_Alternaria\_brassicicola\_strain\_BHU-LMMT21 503  
 KX139152.1\_Alternaria\_brassicicola\_strain\_BHU-LMMT19 G-- -ATCAGG TAGGGATACC CGCTGAACTT AA 503  
 KX139165.1\_Alternaria\_macrospora\_strain\_BHU-LMMT32 503  
 KX139166.1\_Alternaria\_macrospora\_strain\_BHU-LMMT33 503  
 KX139150.1\_Alternaria\_solani\_strain\_BHU-LMMT17 G-- -ATCAGG TAGGGATACC 503  
 KX139151.1\_Alternaria\_solani\_strain\_BHU-LMMT18 503  
 KX139162.1\_Alternaria\_porri\_strain\_BHU-LMMT29 503  
 KX139159.1\_Alternaria\_brassicicola\_strain\_BHU-LMMT26 503  
 KX139160.1\_Alternaria\_brassicicola\_strain\_BHU-LMMT27 503  
 KX139157.1\_Alternaria\_tenuissima\_strain\_BHU-LMMT24 G-- -ATC- - - - - 503  
 KX139161.1\_Alternaria\_porri\_strain\_BHU-LMMT28 503  
 KX139155.1\_Alternaria\_brassicicola\_strain\_BHU-LMMT22 503  
 KX139156.1\_Alternaria\_brassicicola\_strain\_BHU-LMMT23 GTTGCTCATC CGGGCTTTTG CCCGGTGAC TCTTCTGTAG GCAGGCCAGC 461  
 Consensus G-- -ATCAGG

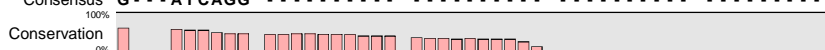

|                                                      | 760                                            | 780   |     |
|------------------------------------------------------|------------------------------------------------|-------|-----|
| KX118413.1_Alternaria_alternata_strain_BHU-LMMT02    | -----                                          | ----- | 503 |
| KX118415.1_Alternaria_alternata_strain_BHU-LMMT04    | -----                                          | ----- | 503 |
| KX118418.1_Alternaria_alternata_strain_BHU-LMMT07    | -----                                          | ----- | 503 |
| KX118419.1_Alternaria_alternata_strain_BHU-LMMT08    | -----                                          | ----- | 503 |
| KX118421.1_Alternaria_brassicicola_strain_BHU-LMMT10 | -----                                          | ----- | 503 |
| KX118425.1_Alternaria_brassiccae_strain_BHU-LMMT14   | -----                                          | ----- | 503 |
| KX118426.1_Alternaria_brassiccae_strain_BHU-LMMT15   | -----                                          | ----- | 503 |
| KX118427.1_Alternaria_solani_strain_BHU-LMMT16       | -----                                          | ----- | 503 |
| KX118424.1_Alternaria_brassicicola_strain_BHU-LMMT13 | -----                                          | ----- | 503 |
| KX118414.1_Alternaria_alternata_strain_BHU-LMMT03    | -----                                          | ----- | 503 |
| KX118423.1_Alternaria_brassicicola_strain_BHU-LMMT12 | -----                                          | ----- | 503 |
| KX118412.1_Alternaria_alternata_strain_BHU-LMMT01    | -----                                          | ----- | 503 |
| KX118417.1_Alternaria_alternata_strain_BHU-LMMT06    | -----                                          | ----- | 503 |
| KX118420.1_Alternaria_alternata_strain_BHU-LMMT09    | -----                                          | ----- | 503 |
| KX118422.1_Alternaria_brassicicola_strain_BHU-LMMT11 | -----                                          | ----- | 503 |
| KX179478.1_Alternaria_alternata_strain_BHU-LMMT35    | -----                                          | ----- | 503 |
| KX118416.1_Alternaria_alternata_strain_BHU-LMMT05    | -----                                          | ----- | 503 |
| KX179483.1_Alternaria_alternata_strain_BHU-LMMT40    | -----                                          | ----- | 503 |
| KX179484.1_Alternaria_alternata_strain_BHU-LMMT41    | -----                                          | ----- | 503 |
| KX179485.1_Alternaria_alternata_strain_BHU-LMMT42    | -----                                          | ----- | 503 |
| KX179482.1_Alternaria_solani_strain_BHU-LMMT39       | -----                                          | ----- | 503 |
| KX139158.1_Alternaria_tenuissima_strain_BHU-LMMT25   | -----                                          | ----- | 503 |
| JQ070079.1                                           | -----                                          | ----- | 503 |
| KX179480.1_Alternaria_alternata_strain_BHU-LMMT37    | -----                                          | ----- | 503 |
| KX179479.1_Alternaria_alternata_strain_BHU-LMMT36    | -----                                          | ----- | 503 |
| KX139153.1_Alternaria_brassiccae_strain_BHU-LMMT20   | -----                                          | ----- | 503 |
| KX179489.1_Alternaria_alternata_strain_BHU-LMMT46    | -----                                          | ----- | 503 |
| KX139163.1_Alternaria_eichhorniae_strain_BHU-LMMT30  | -----                                          | ----- | 503 |
| KX179488.1_Alternaria_alternata_strain_BHU-LMMT45    | -----                                          | ----- | 503 |
| KX179481.1_Alternaria_solani_strain_BHU-LMMT38       | -----                                          | ----- | 503 |
| KX179487.1_Alternaria_sp._2_MM-2016                  | -----                                          | ----- | 503 |
| KX139164.1_Alternaria_eichhorniae_strain_BHU-LMMT31  | -----                                          | ----- | 503 |
| KX179490.1_Alternaria_sp._3_MM-2016                  | -----                                          | ----- | 503 |
| KX179477.1_Alternaria_alternata_strain_BHU-LMMT34    | -----                                          | ----- | 503 |
| KX179486.1_Alternaria_sp._1_MM-2016                  | -----                                          | ----- | 503 |
| KX179491.1_Alternaria_sp._4_MM-2016                  | -----                                          | ----- | 503 |
| KX139154.1_Alternaria_brassiccae_strain_BHU-LMMT21   | -----                                          | ----- | 503 |
| KX139152.1_Alternaria_brassiccae_strain_BHU-LMMT19   | -----                                          | ----- | 503 |
| KX139165.1_Alternaria_macrospora_strain_BHU-LMMT32   | -----                                          | ----- | 503 |
| KX139166.1_Alternaria_macrospora_strain_BHU-LMMT33   | -----                                          | ----- | 503 |
| KX139150.1_Alternaria_solani_strain_BHU-LMMT17       | -----                                          | ----- | 503 |
| KX139151.1_Alternaria_solani_strain_BHU-LMMT18       | -----                                          | ----- | 503 |
| KX139162.1_Alternaria_porri_strain_BHU-LMMT29        | -----                                          | ----- | 503 |
| KX139159.1_Alternaria_brassicicola_strain_BHU-LMMT26 | -----                                          | ----- | 503 |
| KX139160.1_Alternaria_brassicicola_strain_BHU-LMMT27 | -----                                          | ----- | 503 |
| KX139157.1_Alternaria_tenuissima_strain_BHU-LMMT24   | -----                                          | ----- | 503 |
| KX139161.1_Alternaria_porri_strain_BHU-LMMT28        | -----                                          | ----- | 503 |
| KX139155.1_Alternaria_brassiccae_strain_BHU-LMMT22   | -----                                          | ----- | 503 |
| KX139156.1_Alternaria_brassiccae_strain_BHU-LMMT23   | ATCAGTTTGG GCGGTAGGAT AAAGGTCTCT GTCACGTACC TC | ----- | 503 |
| Consensus                                            | -----                                          | ----- | 503 |
| Conservation                                         | -----                                          | ----- | 503 |
| 100%                                                 | -----                                          | ----- | 503 |
| 0%                                                   | -----                                          | ----- | 503 |
